# Supplementary material for: Phosphine substitution and linkage isomerization in cyclopentadienylruthenium bis(triphenylphosphine)thiocyanide and selenocyanide, CpRu(PPh3)2NCS and CpRu(PPh3)2SeCN
Source: Royal Society of Chemistry journal article supplement (doi:10.1039/d3dt02397d), 2023-01-01
Supplement: d3dt02397d1.pdf [file d3dt02397d1.pdf]

## Phosphine Substitution and Linkage Isomerization in CpRu(PPh<sub>3</sub>)<sub>2</sub>NCS and CpRu(PPh<sub>3</sub>)<sub>2</sub>SeCN

Duy-Khoi Dang<sup>a</sup>, Damla Cehreli,<sup>a</sup> Benjamin S. Rich<sup>a</sup>, Terry E. Haas<sup>b</sup>, Frank R. Fronczek,<sup>c</sup> and Rein U. Kirss<sup>\*a</sup>

<sup>a</sup>Department of Chemistry and Chemical Biology Northeastern University, Boston MA 02115.

<sup>b</sup>Department of Chemistry Tufts University, Medford MA 02155.

<sup>c</sup>Department of Chemistry Louisiana State University, Baton Rouge, LA 70803

### Experimental Details

|                          |    |
|--------------------------|----|
| General Procedures       | S4 |
| Synthesis of <b>2a</b> . | S4 |
| Synthesis of <b>2b</b> . | S4 |
| Synthesis of <b>3b</b> . | S5 |
| Synthesis of <b>4b</b> . | S5 |
| Kinetic Measurements     | S6 |

### Computational Methods

|                                                                                                                                                                                                                                                   |     |
|---------------------------------------------------------------------------------------------------------------------------------------------------------------------------------------------------------------------------------------------------|-----|
| <b>Figure S1:</b> (a) <sup>1</sup> H NMR spectrum of <b>1a</b> in CDCl <sub>3</sub> .                                                                                                                                                             | S8  |
| (b) <sup>31</sup> P NMR spectrum of <b>1a</b> in CDCl <sub>3</sub> .                                                                                                                                                                              |     |
| <b>Figure S2:</b> (a) <sup>1</sup> H NMR spectrum of <b>2a</b> in CDCl <sub>3</sub> .                                                                                                                                                             | S9  |
| (b) <sup>31</sup> P NMR spectrum of <b>2a</b> in CDCl <sub>3</sub> .                                                                                                                                                                              |     |
| (c) <sup>1</sup> H NMR spectrum of CDCl <sub>3</sub> containing 0.03% v/v TMS.                                                                                                                                                                    |     |
| <b>Figure S3:</b> (a) Best molecular structure of <b>2b</b> .                                                                                                                                                                                     | S10 |
| (b) Two superimposed orientations of <b>4b</b> showing the mirror-related disorder in the structure.                                                                                                                                              |     |
| <b>Figure S4:</b> (a) <sup>1</sup> H NMR spectrum of <b>2b</b> in CDCl <sub>3</sub> .                                                                                                                                                             | S11 |
| (b) <sup>31</sup> P NMR spectrum of <b>2b</b> in CDCl <sub>3</sub> .                                                                                                                                                                              |     |
| (c) <sup>31</sup> P NMR of a mixture of <b>2a</b> and <b>2b</b> in CDCl <sub>3</sub> .                                                                                                                                                            |     |
| <b>Figure S5:</b> (a) Reaction of CpRu(PPh <sub>3</sub> ) <sub>2</sub> Cl with SCN <sup>-</sup> in THF @ 47°C.                                                                                                                                    | S12 |
| (b) isomerization of <b>2b</b> to <b>2a</b> with SCN <sup>-</sup> in THF/10% C <sub>6</sub> D <sub>6</sub> @ 40°C.                                                                                                                                |     |
| <b>Figure S6:</b> (a) <sup>1</sup> H NMR spectrum of <b>3b</b> in C <sub>6</sub> D <sub>6</sub> .                                                                                                                                                 | S13 |
| (b) <sup>31</sup> P NMR spectrum of <b>3b</b> in C <sub>6</sub> D <sub>6</sub> .                                                                                                                                                                  |     |
| <b>Figure S7:</b> (a) <sup>1</sup> H NMR spectrum of <b>4b</b> in CDCl <sub>3</sub> .                                                                                                                                                             | S14 |
| (b) <sup>31</sup> P NMR spectrum of <b>4b</b> in CDCl <sub>3</sub> .                                                                                                                                                                              |     |
| <b>Figure S8:</b> (a) <sup>31</sup> P NMR spectrum of <b>1a</b> (5 mM) + PMePh <sub>2</sub> (41 mM) in C <sub>6</sub> H <sub>5</sub> F/10% v/v C <sub>6</sub> D <sub>6</sub> at t=0.                                                              | S15 |
| (b) <sup>31</sup> P NMR spectrum of <b>1a</b> + PMePh <sub>2</sub> in C <sub>6</sub> H <sub>5</sub> F/10% v/v C <sub>6</sub> D <sub>6</sub> after heating at 40°C for 317 h showing 75% conversion to <b>2a</b> with small amounts of <b>2b</b> . |     |
| <b>Figure S9:</b> (a) <sup>31</sup> P NMR spectrum of <b>1a</b> (5 mM) + PMePh <sub>2</sub> (39 mM) in C <sub>6</sub> H <sub>5</sub> F/10% v/v C <sub>6</sub> D <sub>6</sub> after heating at 50°C for 21.5 h                                     | S16 |

|                                                                                                                                                                                                                                                                                                                            |     |
|----------------------------------------------------------------------------------------------------------------------------------------------------------------------------------------------------------------------------------------------------------------------------------------------------------------------------|-----|
| (b) <sup>31</sup> P NMR spectrum of <b>1a</b> + PMePh <sub>2</sub> in C <sub>6</sub> H <sub>5</sub> F/10% v/v C <sub>6</sub> D <sub>6</sub> after heating at 50°C for 150 h showing 96% conversion to <b>2a</b> .                                                                                                          |     |
| <b>Figure S10:</b> (a) <sup>31</sup> P NMR spectrum of <b>1a</b> (7 mM) + PMePh <sub>2</sub> (76 mM) in THF/10% v/v C <sub>6</sub> D <sub>6</sub> at t=0 s.                                                                                                                                                                | S17 |
| (b) <sup>31</sup> P NMR spectrum of <b>1a</b> + PMePh <sub>2</sub> in THF/10% v/v C <sub>6</sub> D <sub>6</sub> after heating at 40°C for 500 h.                                                                                                                                                                           |     |
| <b>Figure S11:</b> Concentration Changes in the Reaction Between <b>1a</b> and PMePh <sub>2</sub> in THF/10% C <sub>6</sub> D <sub>6</sub> @ 40°C.                                                                                                                                                                         | S18 |
| <b>Figure S12:</b> Representative plots of ln[CpRu(PPh <sub>3</sub> ) <sub>2</sub> NCS] vs t for the reaction between <b>1a</b> and PMePh <sub>2</sub> in (a) THF/10% C <sub>6</sub> D <sub>6</sub> and (b) C <sub>6</sub> H <sub>5</sub> F/10% C <sub>6</sub> D <sub>6</sub> .                                            | S19 |
| <b>Figure S13:</b> Eyring plot for the reaction between <b>1a</b> and PMePh <sub>2</sub> in (a) THF/10% C <sub>6</sub> D <sub>6</sub> , (b) C <sub>6</sub> H <sub>5</sub> F/10% C <sub>6</sub> D <sub>6</sub> and (c) Plot of 1/k <sub>obs</sub> vs [PPh <sub>3</sub> ] at 40°C in THF/10% C <sub>6</sub> D <sub>6</sub> . | S20 |
| <b>Figure S14:</b> Concentration Changes in the Reaction Between <b>1a</b> , PMePh <sub>2</sub> , and SCN <sup>-</sup> in (a) THF/10% C <sub>6</sub> D <sub>6</sub> @ 40°C and (b) C <sub>6</sub> H <sub>5</sub> F/10% C <sub>6</sub> D <sub>6</sub> .                                                                     | S21 |
| <b>Figure S15:</b> (a) <sup>31</sup> P NMR spectrum of <b>3b</b> (5.7 mM) + PMePh <sub>2</sub> (50 mM) in C <sub>6</sub> H <sub>5</sub> F/10% v/v C <sub>6</sub> D <sub>6</sub> at t=0 s                                                                                                                                   | S22 |
| (b) <sup>31</sup> P NMR spectrum of <b>3b</b> + PMePh <sub>2</sub> in C <sub>6</sub> H <sub>5</sub> F/10% v/v C <sub>6</sub> D <sub>6</sub> after heating at 30°C for 37.7 h.                                                                                                                                              |     |
| <b>Figure S16:</b> Representative plots of ln[CpRu(PPh <sub>3</sub> ) <sub>2</sub> SeCN] vs t for the reaction between <b>1a</b> and PMePh <sub>2</sub> in C <sub>6</sub> H <sub>5</sub> F/10% C <sub>6</sub> D <sub>6</sub> and (b) k <sub>obs</sub> vs [SeCN] @ 29°C                                                     | S23 |
| <b>Figure S17:</b> (a) Eyring plot for the reaction between <b>3b</b> and PMePh <sub>2</sub> in C <sub>6</sub> H <sub>5</sub> F/10% C <sub>6</sub> D <sub>6</sub> (b) Plot of 1/k <sub>obs</sub> vs [PPh <sub>3</sub> ] at 30°C in C <sub>6</sub> H <sub>5</sub> F/10% C <sub>6</sub> D <sub>6</sub> .                     | S24 |
| <b>Table S1:</b> Concentrations of reactants and products: CpRu(PPh <sub>3</sub> ) <sub>2</sub> NCS ( <b>1a</b> ) + PMePh <sub>2</sub> in THF/C <sub>6</sub> D <sub>6</sub> @ 40°C (see Figure S10 for plots)                                                                                                              | S25 |
| <b>Table S2:</b> Rate Constants for Phosphine Exchange: <b>1a</b> + PMePh <sub>2</sub> .                                                                                                                                                                                                                                   | S26 |
| <b>Table S3:</b> Rate Constants for Phosphine Exchange: <b>3b</b> + PMePh <sub>2</sub> .                                                                                                                                                                                                                                   | S26 |
| <b>Table S4.</b> Sample and crystal data for <b>1a</b> .                                                                                                                                                                                                                                                                   | S27 |
| <b>Table S5.</b> Data collection and structure refinement for <b>1a</b> .                                                                                                                                                                                                                                                  | S28 |
| <b>Table S6.</b> Bond lengths (pm) for <b>1a</b> .                                                                                                                                                                                                                                                                         | S29 |
| <b>Table S7.</b> Bond angles (°) for <b>1a</b> .                                                                                                                                                                                                                                                                           | S31 |
| <b>Table S8.</b> Sample and crystal data for <b>2a</b> .                                                                                                                                                                                                                                                                   | S34 |
| <b>Table S9.</b> Data collection and structure refinement for <b>2a</b> .                                                                                                                                                                                                                                                  | S35 |
| <b>Table S10.</b> Bond lengths (pm) for <b>2a</b> .                                                                                                                                                                                                                                                                        | S36 |
| <b>Table S11.</b> Bond angles (°) for <b>2a</b> .                                                                                                                                                                                                                                                                          | S37 |
| <b>Table S12.</b> Sample and crystal data for <b>3b</b> .                                                                                                                                                                                                                                                                  | S39 |
| <b>Table S13.</b> Data collection and structure refinement for <b>3b</b> .                                                                                                                                                                                                                                                 | S40 |
| <b>Table S14.</b> Bond lengths (pm) for <b>3b</b> .                                                                                                                                                                                                                                                                        | S41 |

|                                                                            |     |
|----------------------------------------------------------------------------|-----|
| <b>Table S15.</b> Bond angles (°) for <b>3b</b> .                          | S43 |
| <b>Table S16.</b> Sample and crystal data for <b>4b</b> .                  | S46 |
| <b>Table S17.</b> Data collection and structure refinement for <b>4b</b> . | S47 |
| <b>Table S18.</b> Bond lengths (pm) for <b>4b</b> .                        | S48 |
| <b>Table S19.</b> Bond angles (°) for <b>4b</b> .                          | S50 |
| <b>Derivation of the rate law</b>                                          | S54 |
| <b>References</b>                                                          | S55 |

## Experimental Details

Cyclopentadiene, RuCl<sub>3</sub>·xH<sub>2</sub>O, triphenylphosphine, methylphenylphosphine, KSCN, and KSeCN are commercially available (Fisher Acros). Solvents were purified by distillation from Na/benzophenone (C<sub>6</sub>D<sub>6</sub>, THF) or P<sub>2</sub>O<sub>5</sub> (CDCl<sub>3</sub>, C<sub>6</sub>H<sub>5</sub>F). All ruthenium compounds described in this work are air stable as solids, but their syntheses were performed under purified nitrogen atmospheres using Schlenk techniques or a M. I. Braun glove box. NMR spectra were recorded at 400 MHz for <sup>1</sup>H and 162 MHz for <sup>31</sup>P{<sup>1</sup>H} on a Mercury XL300 spectrometer. Proton chemical shifts are reported relative to residual protons in the solvent (CHCl<sub>3</sub> at 7.24 ppm and C<sub>6</sub>D<sub>5</sub>H at 7.15 ppm relative to TMS at 0.00 ppm). Phosphorus chemical shifts are reported relative to 85% H<sub>3</sub>PO<sub>4</sub> at 0.0 ppm. IR spectra were recorded as solids on a Bruker Astra ATR spectrometer equipped with ZnSe windows. Melting points were determined in capillary tubes using an Electrothermal 9110 or SRS Digimelt melting point apparatus and are uncorrected. Elemental analyses (C, H) were performed by Columbia Analytical Services, Inc. Tucson, AZ. Electrochemical measurements were made under nitrogen on a BAS 100 B/W electrochemical workstation or Pine electrochemical apparatus at 22°C using 1 × 10<sup>-3</sup> M solutions in dry CH<sub>2</sub>Cl<sub>2</sub>, 0.1 M <sup>n</sup>Bu<sub>4</sub>NPF<sub>6</sub> or <sup>n</sup>Bu<sub>4</sub>NBF<sub>4</sub> as supporting electrolyte at a scan rate of 100mV/s. The working electrode was a 3 mm Pt disk with a Pt wire as auxiliary electrode. A silver wire was used as a pseudo-reference electrode with ferrocene added as an internal standard. All potentials are referenced to ferrocene (E<sub>1/2</sub> = 0.00 V).

### *Synthesis of CpRu(PPh<sub>3</sub>)<sub>2</sub>NCS (1a)*

Cyclopentadienylrutheniumbis(triphenylphosphine)thiocyanate, CpRu(PPh<sub>3</sub>)<sub>2</sub>NCS **1a**, was prepared by literature procedures <sup>1</sup> from CpRu(PPh<sub>3</sub>)<sub>2</sub>Cl <sup>2</sup> and KSCN in methanol. Crystals suitable for X-ray crystallography were grown by slow evaporation of CH<sub>2</sub>Cl<sub>2</sub> solutions.

### *Synthesis of CpRu(PPh<sub>3</sub>)(PMePh<sub>2</sub>)NCS (2a)*

A solution of **1a** (106 mg, 0.141 mmols) and PMePh<sub>2</sub> (29 μL, 0.154 mmols) in 10 mL fluorobenzene was refluxed under nitrogen for 13 h. Solvent was evaporated under vacuum and the residue dissolved in CH<sub>2</sub>Cl<sub>2</sub>. The yellow-orange solution was passed through a thin pad of neutral alumina and the filtrate was layered with hexane. Cooling at -15°C yielded 87.7 mg (91%) of **2a**. The product was characterized by NMR and X-ray crystallography. Crystals of **2a**·CH<sub>2</sub>Cl<sub>2</sub> were grown by slow evaporation of a CH<sub>2</sub>Cl<sub>2</sub> solution. The yellow sample turns a mustard yellow color upon heating in a capillary and darkens to brown or black above 190°C. IR: ν<sub>CN</sub> = 2089 cm<sup>-1</sup>. <sup>1</sup>H (400 Mz, CDCl<sub>3</sub>): δ 7.0-7.6 (m, 25H, aryl), 5.30 (s, CH<sub>2</sub>Cl<sub>2</sub>), 4.22 (s, 5H, Cp), 1.07 (d, J = 8.8 Hz, 3H, CH<sub>3</sub>). <sup>31</sup>P{<sup>1</sup>H}(CDCl<sub>3</sub>): δ 46.0 (d, J=39 Hz), 32.6 (d, J=39 Hz); (THF) δ 47.0 ppm (d, J<sub>PP</sub>= 40 Hz), 34.1 (d, 40 Hz). Anal. Calcd for C<sub>37</sub>H<sub>33</sub>NP<sub>2</sub>RuS: C, 64.71%; H, 4.86%. Found: C, 64.52%; H, 4.37%.

### *Synthesis of CpRu(PPh<sub>3</sub>)(PMePh<sub>2</sub>)SCN (2b)*

A slurry of CpRu(PPh<sub>3</sub>)(PMePh<sub>2</sub>)Cl<sup>3</sup> (106 mg, 0.49 mmols) and KSCN (140 mg, 1.54 mmols) in 50 mL absolute ethanol was refluxed under nitrogen for 24 h. Solvent was evaporated under vacuum and the residue extracted with 25 mL warm CH<sub>2</sub>Cl<sub>2</sub>. The yellow-orange extract was passed through a thin pad of glass wool and the filtrate was

layered with hexane. Cooling at  $-15^{\circ}\text{C}$  overnight yielded 99 mg (29%) **2b**•CH<sub>2</sub>Cl<sub>2</sub> as a yellow-orange solid. The CH<sub>2</sub>Cl<sub>2</sub> can be removed by gentle heating under vacuum to form **2b**. The low yield is attributed to the poor solubility of **2b** in many polar solvents including CH<sub>2</sub>Cl<sub>2</sub>. Polar solvents with the potential to act as Lewis bases (acetone, acetonitrile, alcohols, DMSO) were avoided to prevent possible dissociation of the thiocyanide ligand and formation of a solvated [CpRu(PPh<sub>3</sub>)(PPh<sub>2</sub>Me)(solvent)]<sup>+</sup> cation as observed for CpRu(PPh<sub>3</sub>(PPh<sub>2</sub>Me)X (X=Cl, Br, I).<sup>4</sup> M.p. decomposes without melting above 160°C. IR:  $\nu_{\text{CN}} = 2103\text{ cm}^{-1}$ . <sup>1</sup>H (400 Mz, CDCl<sub>3</sub>):  $\delta$  7.0-7.6 (m, 25H, aryl), 5.30 (s, CH<sub>2</sub>Cl<sub>2</sub>), 4.35 (s, 5H, Cp), 1.07 (d, J = 8.4 Hz, 3H, CH<sub>3</sub>). <sup>31</sup>P{<sup>1</sup>H}(162 MHz, CDCl<sub>3</sub>):  $\delta$  29.5 (d, J=39 Hz), 46.5 (d, J=39 Hz); (THF)  $\delta$  46.8 ppm (d, J<sub>PP</sub>= 41 Hz), 29.4 (d, 41 Hz). Anal. Calcd for C<sub>37</sub>H<sub>33</sub>NP<sub>2</sub>RuS: C, 64.71%; H, 4.86%. Found: C, 64.31%; H, 4.20%.

Crystals of **2b**•CH<sub>2</sub>Cl<sub>2</sub> were grown by slow evaporation of a CH<sub>2</sub>Cl<sub>2</sub> solution but proved to be disordered limiting the quality of the crystal structure. In the opinion of two crystallographers,<sup>5</sup> the problem is a very sophisticated form of molecular disorder that is beyond all the normal treatments we use for simple atom positional disorder. The disorder prevents refinement of bond lengths and angles, but the structure showing an S-bonded thiocyanate ligand and a bent Ru–S–C bond is trustworthy (see Figure S3). Further complications arise from the loss of diffraction data in a hard drive crash at Tufts University.

#### *Synthesis of CpRu(PPh<sub>3</sub>)<sub>2</sub>SeCN (3b)*

A slurry of CpRu(PPh<sub>3</sub>)<sub>2</sub>Cl (444 mg, 0.61 mmols) and KSeCN (488 mg, 3.39 mmols) in 50 mL absolute ethanol was stirred under nitrogen for 10 days. The orange slurry turned yellow over the course of the reaction. (Heating the mixture leads to black solids. Shorter reaction times tend to reduce yields.) Addition of 50 mL toluene resulted in a red-orange solution. After filtering, solvent volume was reduced under vacuum to about 20 mL. Careful addition of hexane as a separate layer and cooling to  $-20^{\circ}\text{C}$  overnight precipitated 314 mg (65%) **3b** as a red solid. The product can be chromatographed on alumina with CH<sub>2</sub>Cl<sub>2</sub> but a small amount of CpRu(PPh<sub>3</sub>)<sub>2</sub>Cl tends to form. Compound **3b** may be recrystallized from methyl(*n*-butyl)ether/hexane however, crystals suitable for x-diffraction were grown from toluene/hexane.

M.p. 137-139°C, melts to a red-orange liquid. IR:  $\nu_{\text{CN}} = 2097\text{ cm}^{-1}$ . <sup>1</sup>H (400 MHz, C<sub>6</sub>D<sub>6</sub>):  $\delta$  7.26 (br m, 18H, aryl), 6.58 (m, 12 H, aryl), 4.28 (s, 5H, Cp); (400 MHz, CDCl<sub>3</sub>):  $\delta$  7.30 (m, 18H, aryl), 7.20 (m, 12H, aryl), 4.26 (s, 5H, Cp); <sup>31</sup>P{<sup>1</sup>H}(162 MHz, C<sub>6</sub>D<sub>6</sub>):  $\delta$  41.17 s; (CDCl<sub>3</sub>): 41.81 s; (C<sub>6</sub>H<sub>5</sub>F/10% C<sub>6</sub>D<sub>6</sub>)  $\delta$  40.92 (s).

#### *Synthesis of CpRu(PPh<sub>3</sub>)(PMePh<sub>2</sub>)SeCN (4b)*

A solution of **3b** (124.5 mg, 0.157 mmols) and 30  $\mu\text{L}$  (0.16 mmol) PMePh<sub>2</sub> in 10 mL fluorobenzene was stirred at ambient temperature for 5 days precipitating a yellow solid. After filtering and washing with pentane, 35.3 mg (31% yield) of CpRu(PPh<sub>3</sub>)(PMePh<sub>2</sub>)SeCN is obtained. Compound **4b** was characterized further by X-ray diffraction. Like **2b**, there is considerable disorder in the structure, with a mirror-related disorder in the phosphine ligands but the R values (Table S17, R1 = 0.106, wR2 = 0.227) are sufficient to confirm coordination through selenium and a bent Ru–Se–CN bond.

M.p. 160°C d. IR:  $\nu_{\text{CN}} = 2097 \text{ cm}^{-1}$ .  $^1\text{H}$  (400 Mz,  $\text{CDCl}_3$ ):  $\delta$  7.0-7.8 (m, 25H, aryl), 4.48 (s, 5H, Cp), 1.23 (d,  $J = 8.8$  Hz, 3H,  $\text{CH}_3$ ).  $^{31}\text{P}\{^1\text{H}\}$  (162 MHz,  $\text{CDCl}_3$ ):  $\delta$  27.74 (d,  $J=39$  Hz), 46.05 (d,  $J=38$  Hz); ( $\text{C}_6\text{D}_6$ )  $\delta$  46.52 (d,  $J_{\text{PP}} = 38$  Hz), 27.97 (d, 38 Hz); ( $\text{C}_6\text{H}_5\text{F}/10\% \text{ C}_6\text{D}_6$ ) 46.47 (d,  $J=38$  Hz), 27.48 (d,  $J=38$  Hz).

#### *Attempted Synthesis of $\text{CpRu}(\text{PPh}_3)_2\text{TeCN}$ (**5**)*

A slurry of 192.6 mg (0.31 mmol)  $\text{CpRu}(\text{PPh}_3)_2\text{Cl}$  and 225.6 mg (0.31 mmol)  $\text{PPN}^+\text{TeCN}^-$  in 10 mL toluene was stirred at ambient temperature. No reaction was observed by  $^{31}\text{P}$  NMR and subsequent heating of the mixture produced a black intractable product.

#### *Synthesis of $^n\text{Bu}_4\text{NSeCN}$*

By analogy to the synthesis of  $\text{Me}_4\text{NSeCN}$ ,  $^7$  slurry of  $^n\text{Bu}_4\text{Cl}$  (421 mg, 1.51 mmol) and  $\text{KSeCN}$  (221 mg, 1.54 mmol) in 20 mL fluorobenzene was stirred for 7 days at ambient temperature for 7 days. After filtering to remove  $\text{KCl}$ , solvent was evaporated from the filtrate yielding a sticky white solid which solidified upon standing, yielding 314 mg (61 % yield) of  $^n\text{Bu}_4\text{NSeCN}$ . M.p. 139-141.5 °C melts to a colorless liquid.  $^1\text{H}$  (400 Mz,  $\text{CDCl}_3$ ):  $\delta$  1.03 (t, 3H), 1.48 (m, 2H), 1.70 (m, 2H), 3.32 (m, 2 H).  $^{13}\text{C}\{^1\text{H}\}$  (100.63 MHz,  $\text{CDCl}_3$ ):  $\delta$  13.69, 19.80, 24.13, 59.05, 117.36.

#### *Kinetic Measurements*

Kinetic data for reactions between **1a** or **3b** and  $\text{PMePh}_2$  is collected using procedures described for reactions between  $\text{CpRu}(\text{PAR}_3)_2\text{Cl}$  and  $\text{PMePh}_2$ .  $^8$  Flame-sealed 5 mm NMR tubes containing solutions of **1a** or **3b** (5-7 mM) and  $\text{PMePh}_2$  ( $\approx 50$ -70 mM) in  $\text{THF}/10\%$  (v/v)  $\text{C}_6\text{D}_6$  or  $\text{C}_6\text{H}_5\text{F}/10\%$   $\text{C}_6\text{D}_6$  are heated in thermostated block heaters. The rate of substitution of  $\text{PPh}_3$  by  $\text{PMePh}_2$  is measured by monitoring the decrease in the singlet for **1a** or **3b** over time relative to the doublets for  $\text{CpRu}(\text{PPh}_3)(\text{PMePh}_2)\text{NCS}$  (**2a**) and  $\text{CpRu}(\text{PPh}_3)(\text{PMePh}_2)\text{SeCN}$  (**4b**). Typically, three independent measurements of the substitution rate are made at each temperature to determine the rate constants for the reaction.

The reactions were typically driven to  $\geq 80\%$  completion for three reasons. First, beyond 90% reaction signal-to-noise ratio for the lowest intensity resonances makes it difficult to obtain accurate peak areas through integration of the resonances using reasonable scan times. Second, in the later stages of the reaction, sufficient  $\text{PPh}_3$  has built up in the reaction mixture to inhibit substitution and decrease the rate of phosphine exchange. The result is a curvature in the plot of  $\ln[\mathbf{1a}]$  (or  $\ln[\mathbf{3b}]$ ) vs time. Finally, for reactions of **1a** at lower temperatures (e. g 40°C), the reactions are quite slow ( $>14$  days) so in these cases, data collection was ended after reaching 80% completion.

#### **Computational Methods**

All computations were run on the Northeastern University Discovery Cluster. We report the Cartesian coordinates of all the structures optimized using Kohn-Sham density functional theory (M06).

The gas phase calculations on **1-4** were completed over five years ago and relied on the available computational packages found in GaussView 3 and Gaussian 09 Revision B.01 suite.  $^9$  Geometries were optimized followed by harmonic frequency analysis to obtain free energy corrections for each compound. The geometry optimizations and

frequency calculations were performed using the unrestricted UB3LYP exchange-correlation. Each compound was optimized and analyzed twice using two different basis sets. The DGDZVP<sup>10</sup> and LANL2DZ<sup>11</sup> basis sets were used to perform the calculations. Both basis sets are of double-zeta quality in the valence shell. First an optimization for a compound was run followed by a harmonic frequency analysis using the same basis set. Optimized geometries were visualized using Avogadro (V 1.1.1).<sup>12</sup> Spin multiplicity was assumed to be 1 and overall charge was assumed to be 0. The following was used in the route section for all compounds:

```
# opt freq scf=(maxcycle=1024) ub3lyp/basis pop=full
```

where basis refers to the basis used in the calculation, either DGDZVP or LANL2DZ.

The calculations for **1-4** as benzene solvates used the updated Gaussian16 Revision A.03 suite of ab initio quantum chemistry programs using the M06 functional, the def2-TZVP basis set, Grimme's D3 dispersion correction and the Polarizable Continuum Model (PCM) provided by Gaussian.<sup>13</sup>

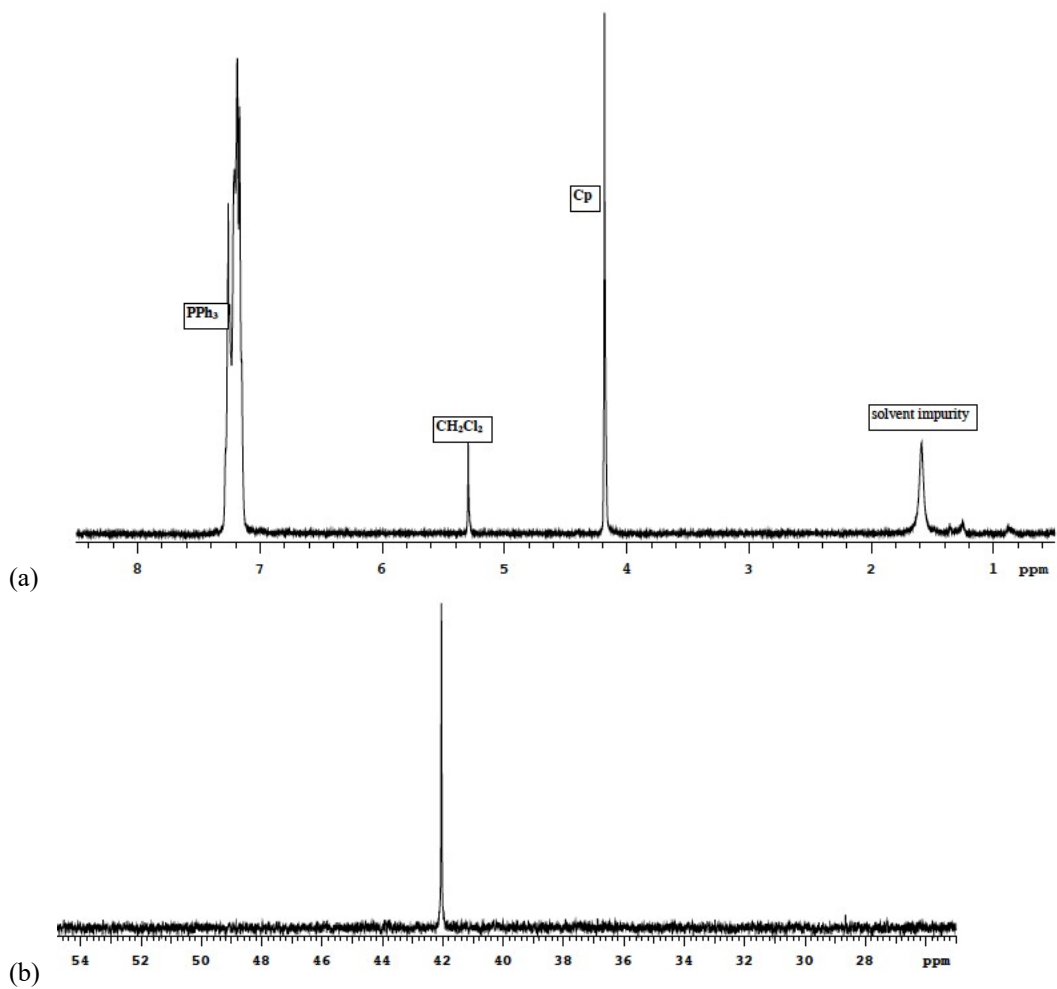

**Figure S1:** (a)  $^1\text{H}$  NMR spectrum of **1a** in  $\text{CDCl}_3$ ; (b)  $^{31}\text{P}$  NMR spectrum of **1a** in  $\text{CDCl}_3$ .



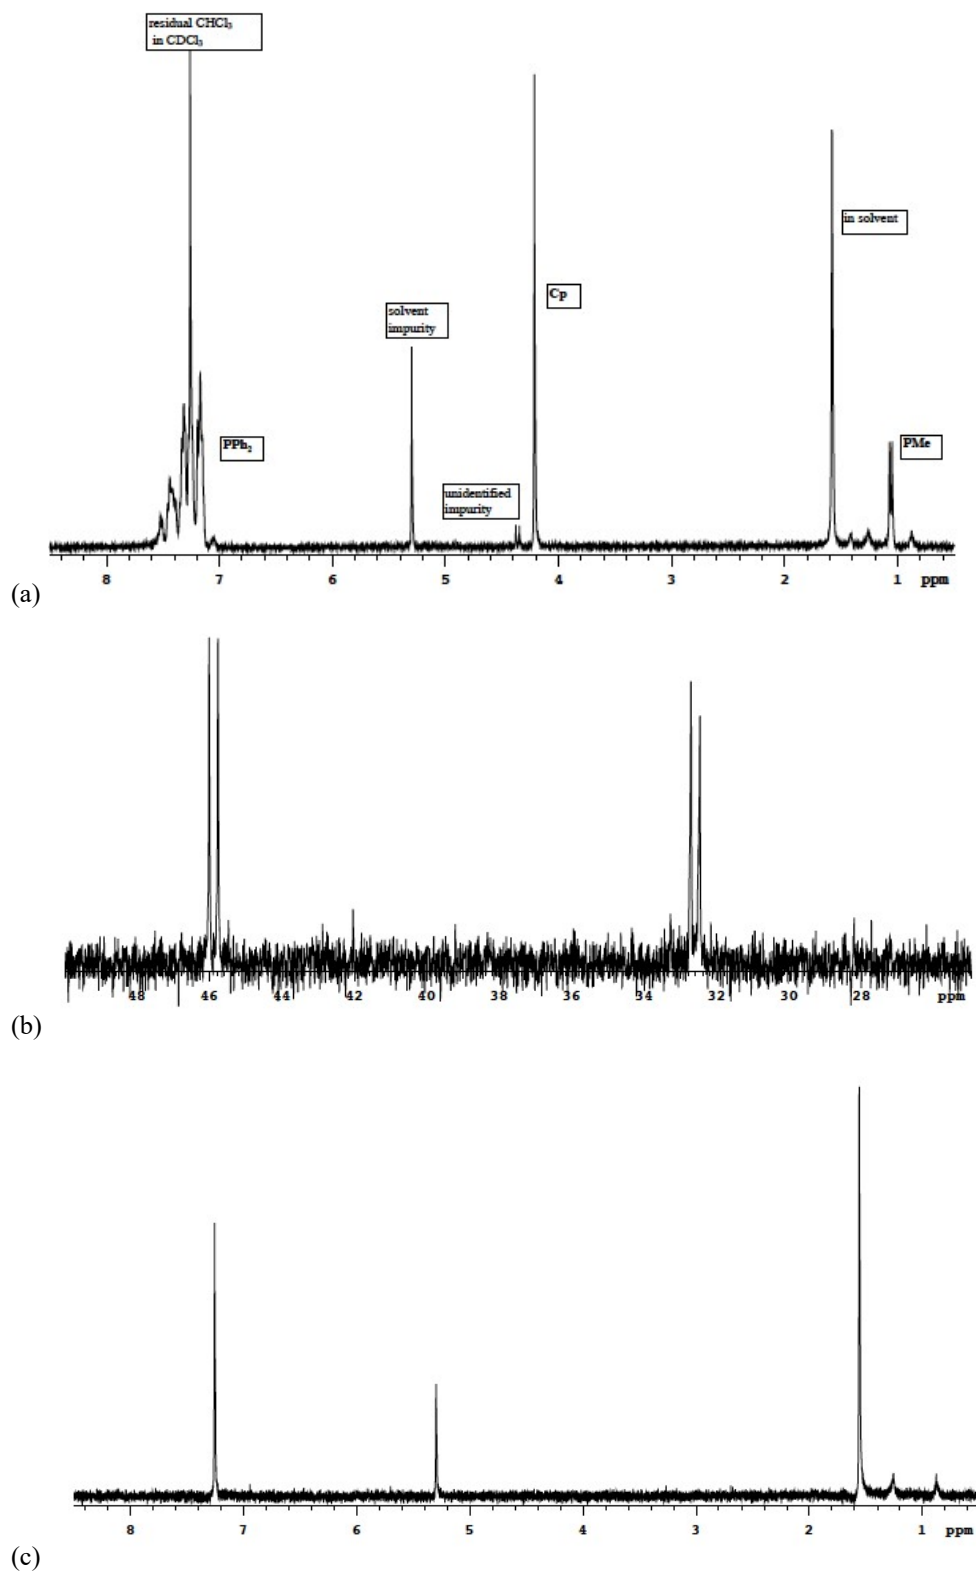

**Figure S2:** (a)  $^1\text{H}$  NMR spectrum of **2a** ( $\text{CH}_2\text{Cl}_2$  often co-crystallizes); (b)  $^{31}\text{P}$  NMR spectrum of **2a**; (c)  $^1\text{H}$  NMR spectrum of  $\text{CDCl}_3$

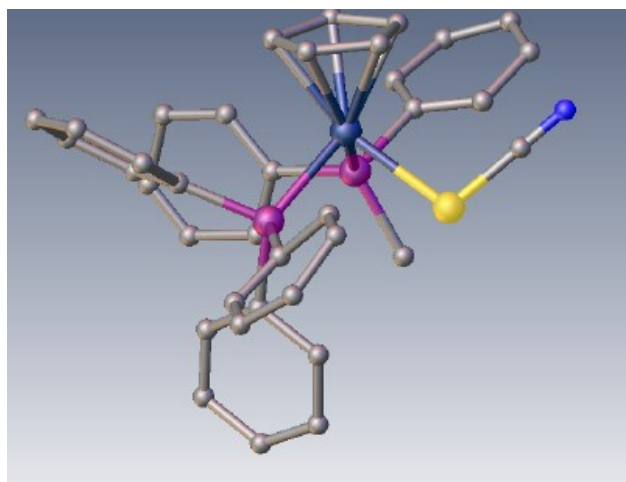

(a)

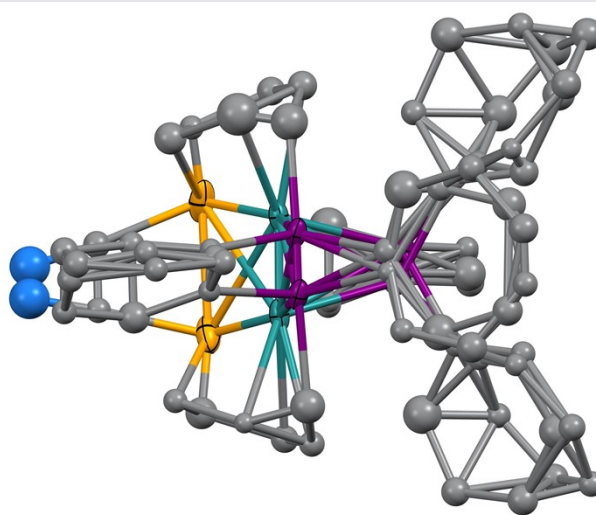

(b)

**Figure S3:** (a) Best molecular structure of **2b** based on molecular disorder that is beyond all the normal treatments we use for simple atom positional disorder. (b) Two superimposed orientations of **4b** showing the mirror-related disorder in the structure.

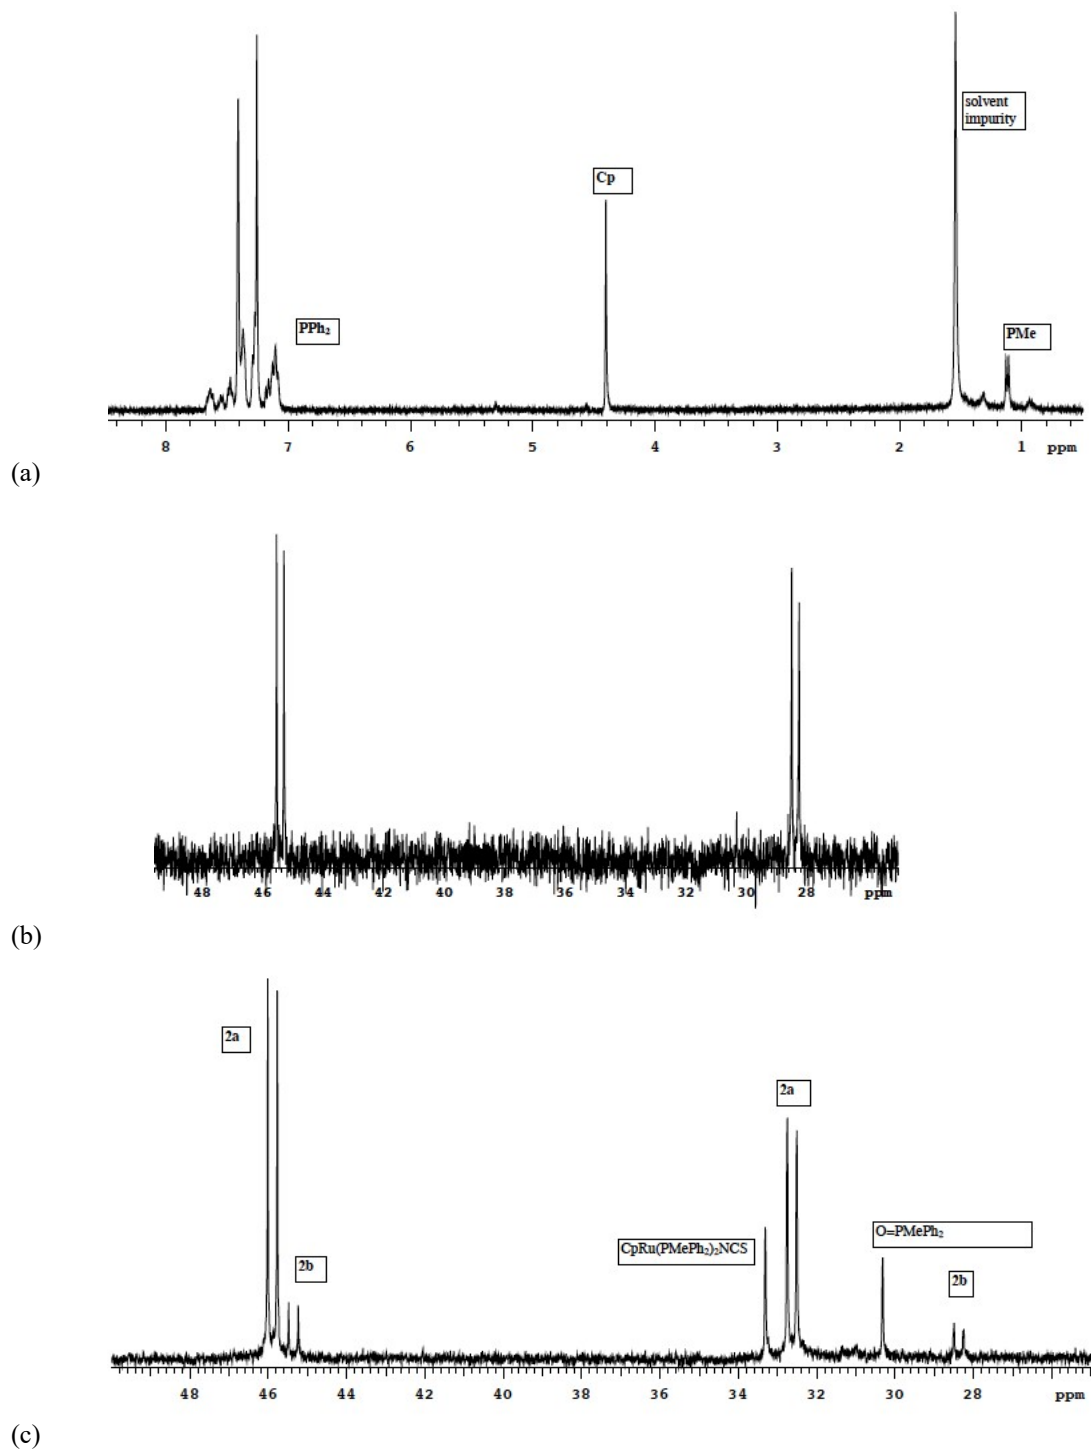

**Figure S4:** (a)  $^1\text{H}$  NMR spectrum of dilute solution of **2b** in  $\text{CDCl}_3$ ; (b)  $^{31}\text{P}$  NMR spectrum of **2b** in  $\text{CDCl}_3$ ; (c)  $^{31}\text{P}$  NMR of a mixture of **2a** and **2b** in  $\text{CDCl}_3$  prior to re-crystallization to remove the two impurities shown in the spectrum.

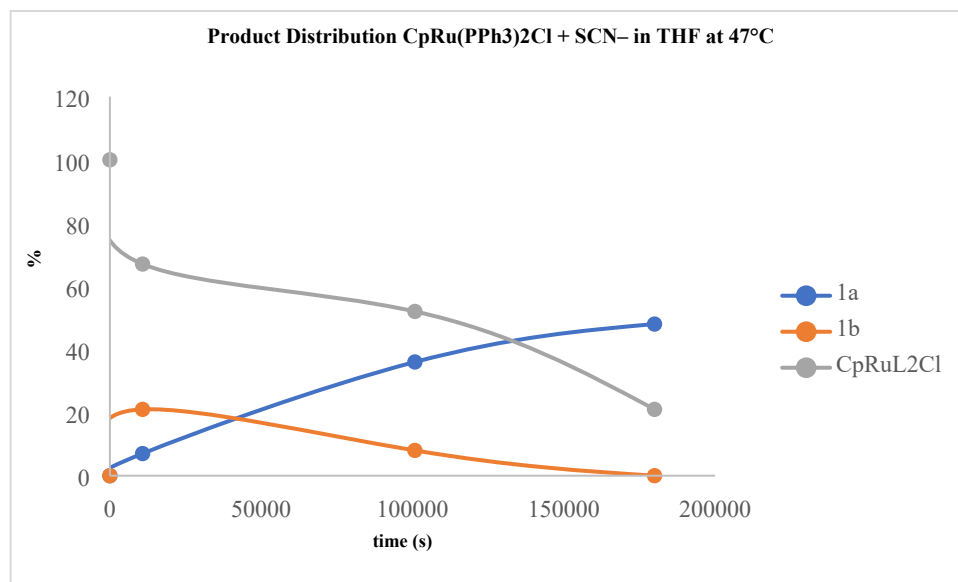

(a)

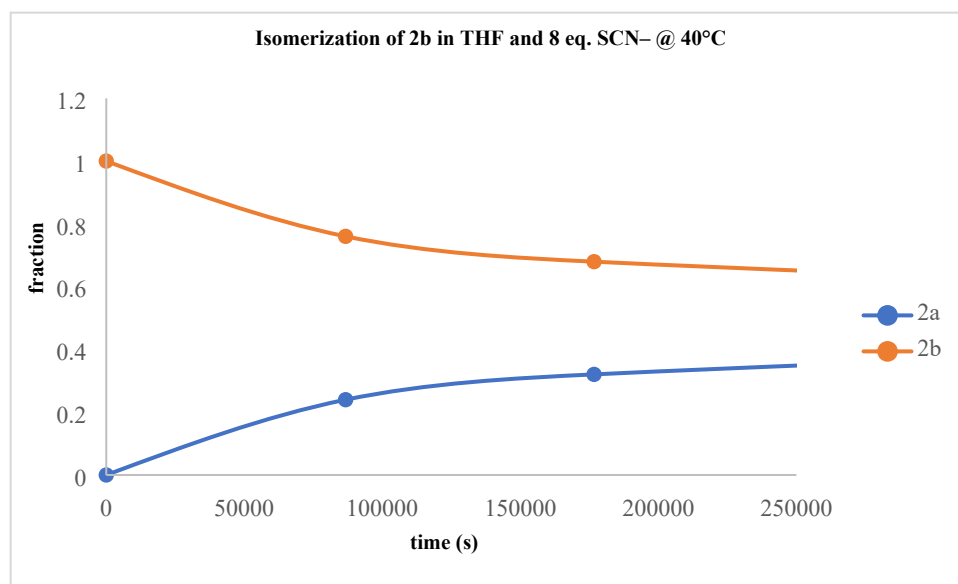

(b)

**Figure S5:** (a) Reaction of CpRu(PPh<sub>3</sub>)<sub>2</sub>Cl with SCN<sup>-</sup> in THF @ 47°C (b) isomerization of **2b** to **2a** with SCN<sup>-</sup> in THF/10% C<sub>6</sub>D<sub>6</sub> @ 40°C

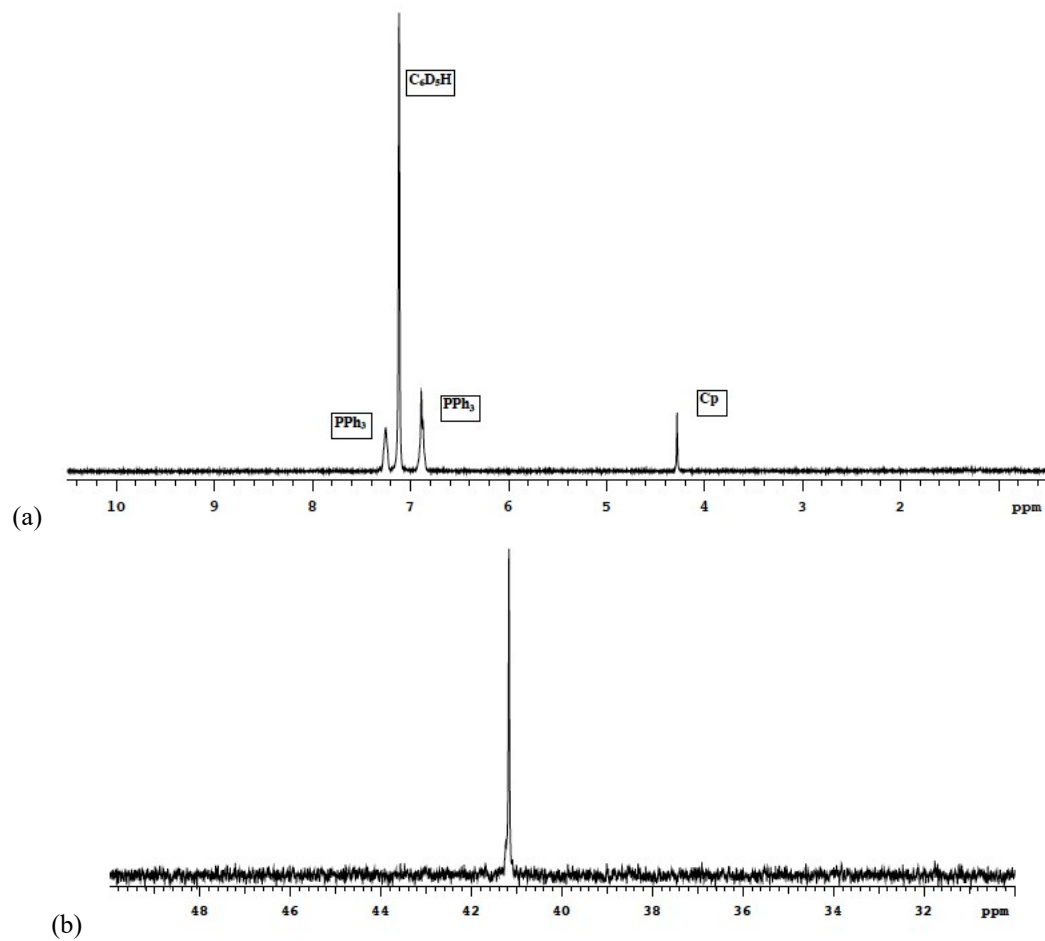

**Figure S6:** (a)  $^1\text{H}$  NMR spectrum of **3b** in  $\text{C}_6\text{D}_6$ ; (b)  $^{31}\text{P}$  NMR spectrum of **3b** in  $\text{C}_6\text{D}_6$ .

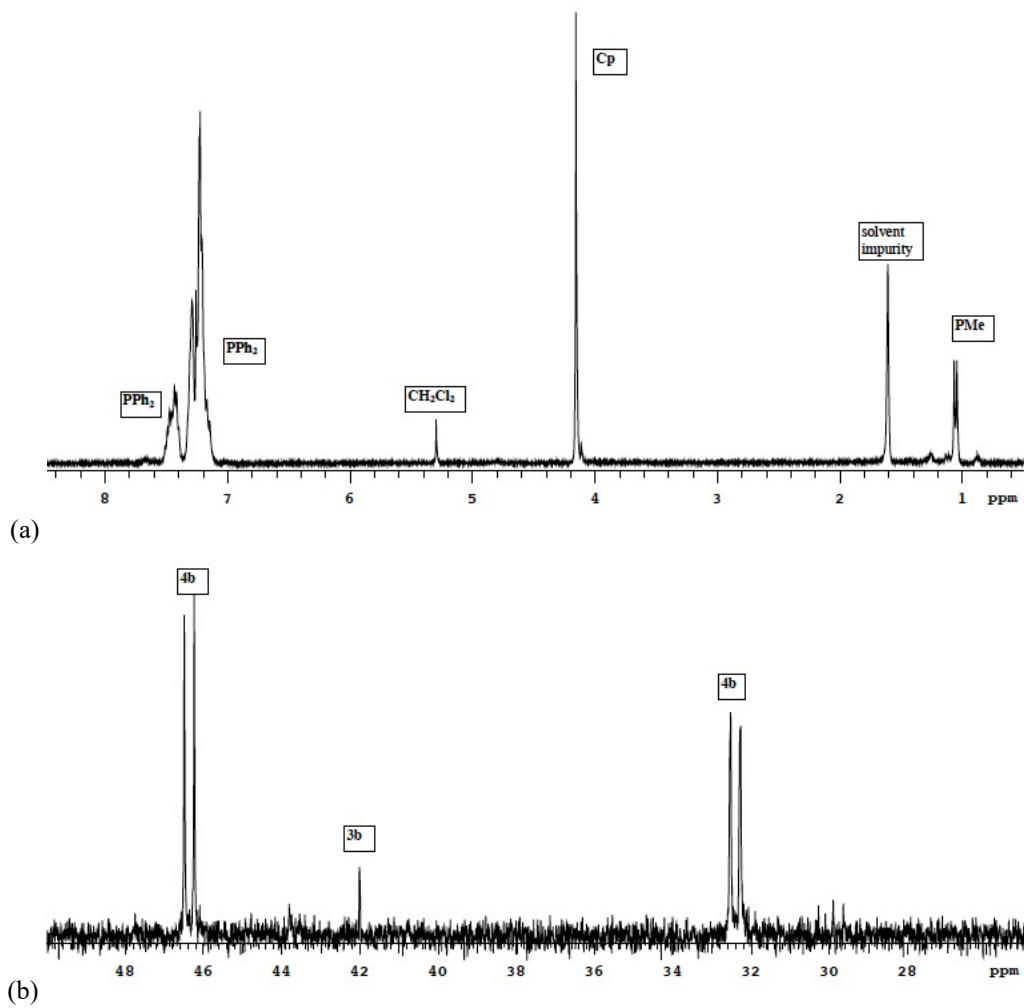

**Figure S7:** (a)  $^1\text{H}$  NMR spectrum of **4b** in  $\text{CDCl}_3$  (some  $\text{CH}_2\text{Cl}_2$  often retained by crystalline products); (b)  $^{31}\text{P}$  NMR spectrum of **4b** in  $\text{CDCl}_3$  ( $\approx 4\%$  impurity of **3b**).

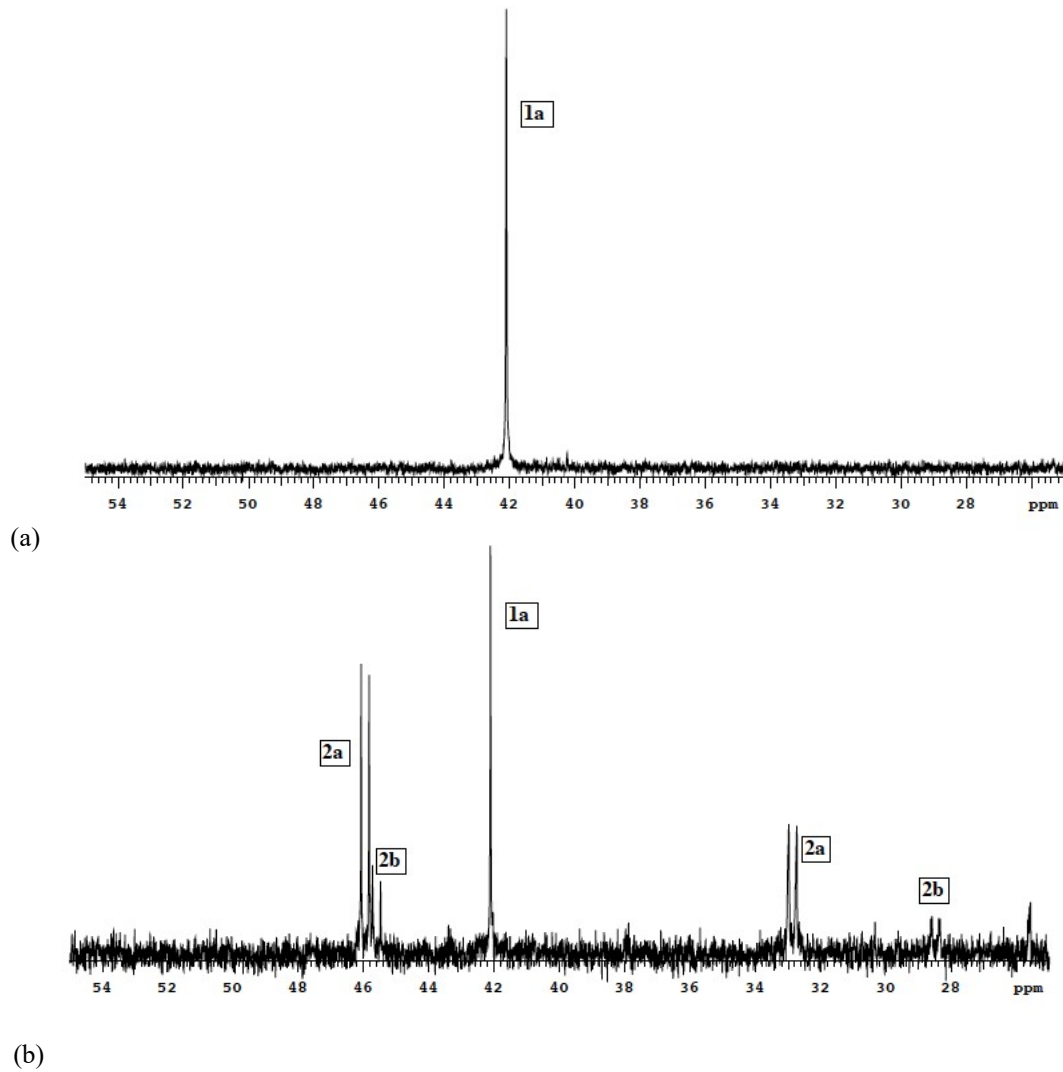

**Figure S8:** (a) <sup>31</sup>P NMR spectrum of **1a** (5 mM) + PMePh<sub>2</sub> (41 mM) in C<sub>6</sub>H<sub>5</sub>F/10% v/v C<sub>6</sub>D<sub>6</sub> at t=0 s; (b) <sup>31</sup>P NMR spectrum of **1a** + PMePh<sub>2</sub> in C<sub>6</sub>H<sub>5</sub>F/10% v/v C<sub>6</sub>D<sub>6</sub> after heating at 40°C for 317 h showing 76% conversion to **2a** with small amounts of **2b**. Resonances for PPh<sub>3</sub> (−5.33 ppm) and PMePh<sub>2</sub> (−27.26 ppm) are not shown.

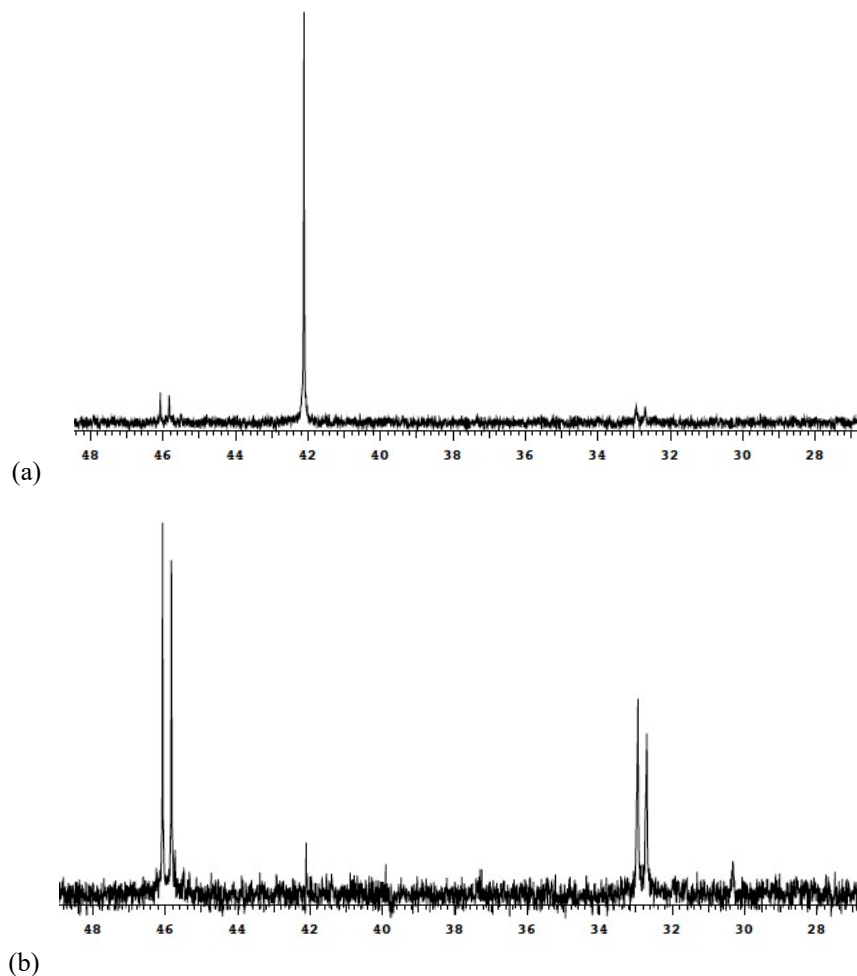

**Figure S9:** (a)  $^{31}\text{P}$  NMR spectrum of **1a** (5 mM) +  $\text{PMePh}_2$  (39 mM) in  $\text{C}_6\text{H}_5\text{F}/10\%$  v/v  $\text{C}_6\text{D}_6$  after heating at  $50^\circ\text{C}$  for 21.5 h; (b)  $^{31}\text{P}$  NMR spectrum of **1a** +  $\text{PMePh}_2$  in  $\text{C}_6\text{H}_5\text{F}/10\%$  v/v  $\text{C}_6\text{D}_6$  after heating at  $50^\circ\text{C}$  for 150 h showing 96% conversion to **2a**. Resonances for  $\text{PPh}_3$  ( $-5.33$  ppm) and  $\text{PMePh}_2$  ( $-27.26$  ppm) are not shown.



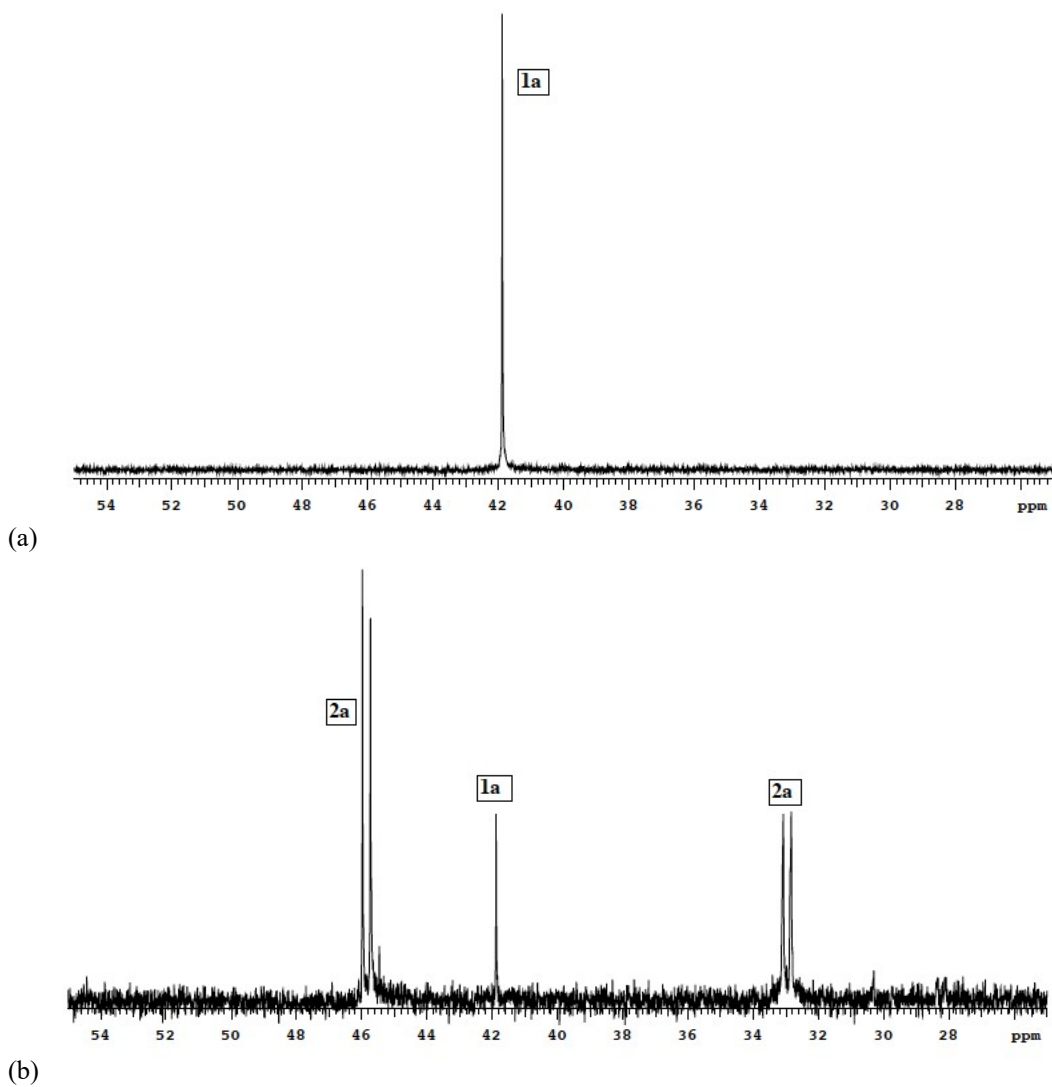

**Figure S10:** (a)  $^{31}\text{P}$  NMR spectrum of **1a** (5 mM,  $^{31}\text{P}$ :  $\delta$  42 ppm) +  $\text{PMePh}_2$  (41 mM) in THF/10% v/v  $\text{C}_6\text{D}_6$  at  $t=0$  s; (b)  $^{31}\text{P}$  NMR spectrum of **1a** +  $\text{PMePh}_2$  in THF/10% v/v  $\text{C}_6\text{D}_6$  after heating at  $40^\circ\text{C}$  for 317 h showing 93% conversion to **2a**. Resonances for  $\text{PPh}_3$  ( $-5.86$  ppm) and  $\text{PMePh}_2$  ( $-27.46$  ppm) are not shown.

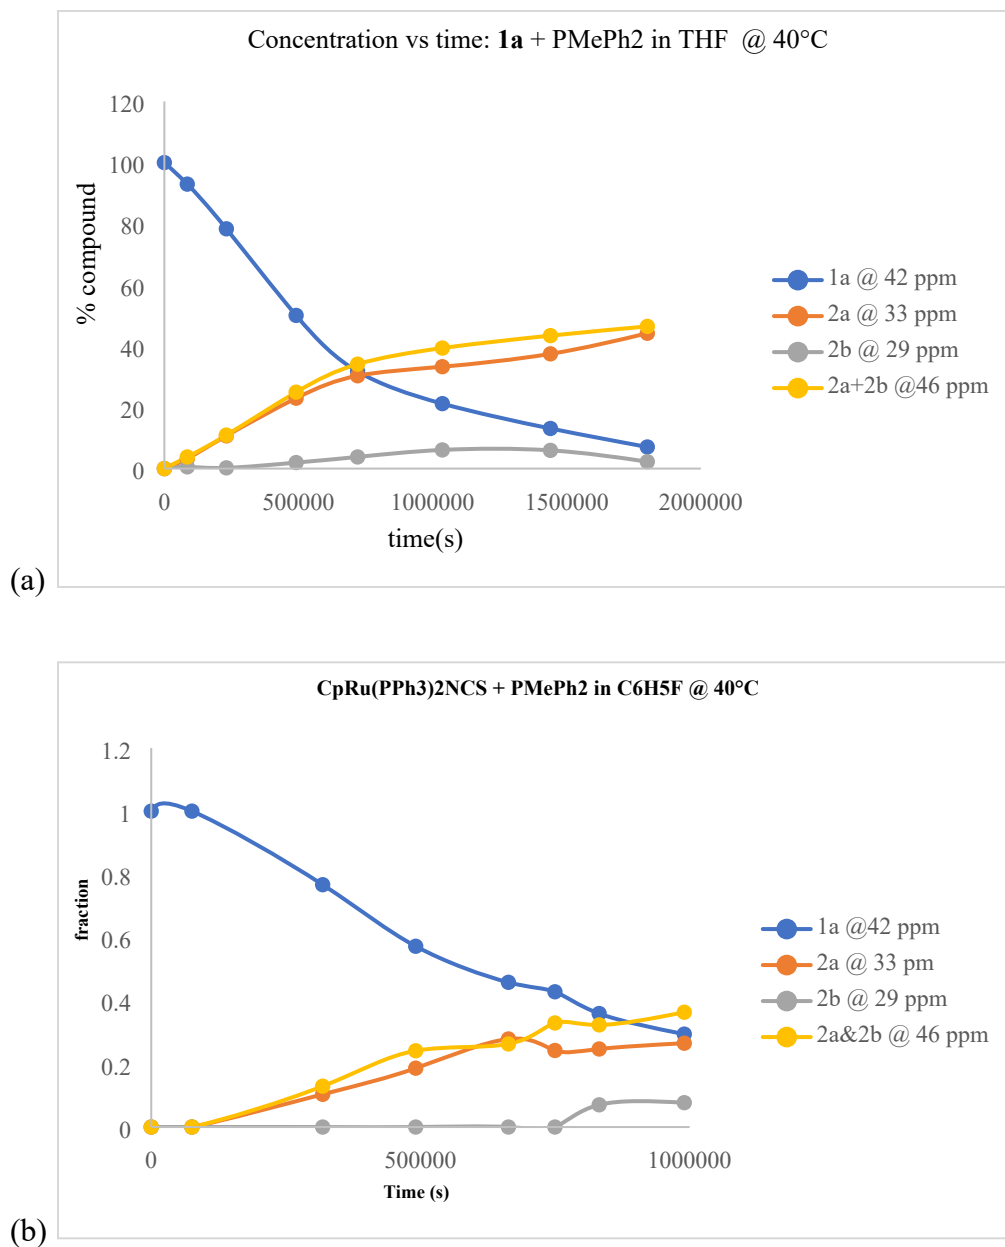

**Figure S11:** Concentration Changes in the Reaction Between **1a** and PMePh<sub>2</sub> @ 40°C in (a) THF/10% C<sub>6</sub>D<sub>6</sub> @ 40°C and (b) C<sub>6</sub>H<sub>5</sub>F/10% C<sub>6</sub>D<sub>6</sub>.

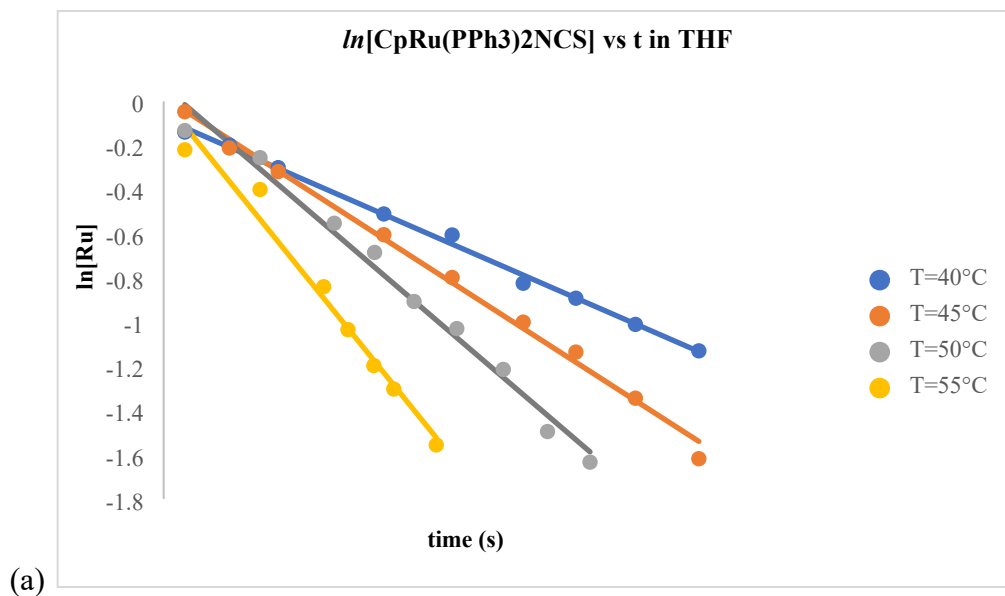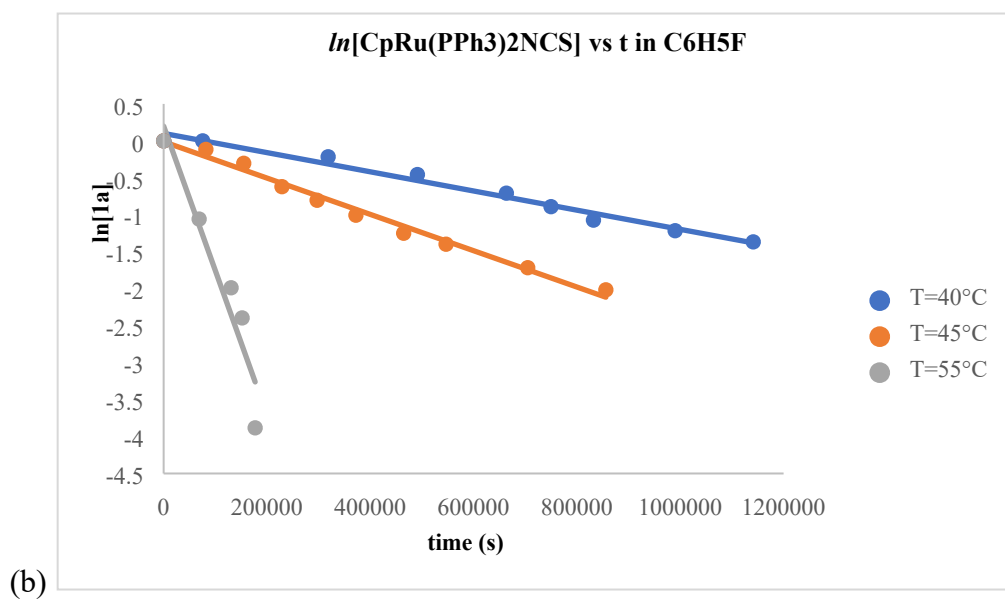

**Figure S12:** Representative plots of  $\ln[\text{CpRu}(\text{PPh}_3)_2\text{NCS}]$  vs  $t$  for the reaction between **1a** and  $\text{PMePh}_2$  in (a) THF/10%  $\text{C}_6\text{D}_6$  and (b)  $\text{C}_6\text{H}_5\text{F}$ /10%  $\text{C}_6\text{D}_6$

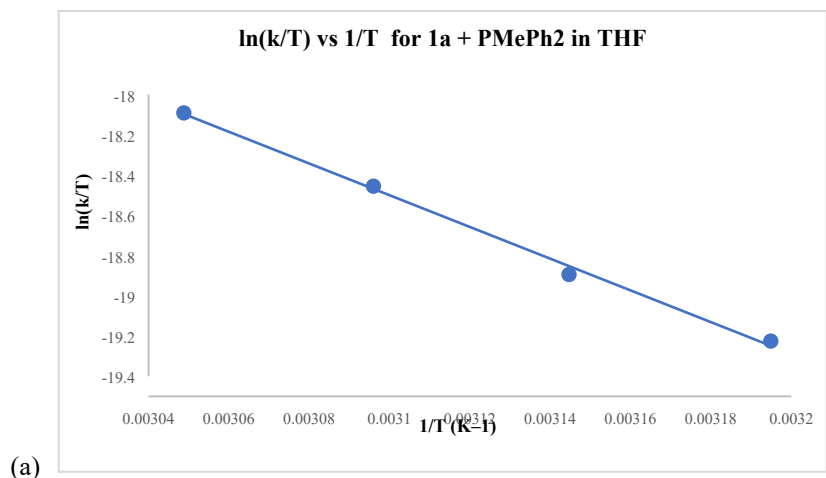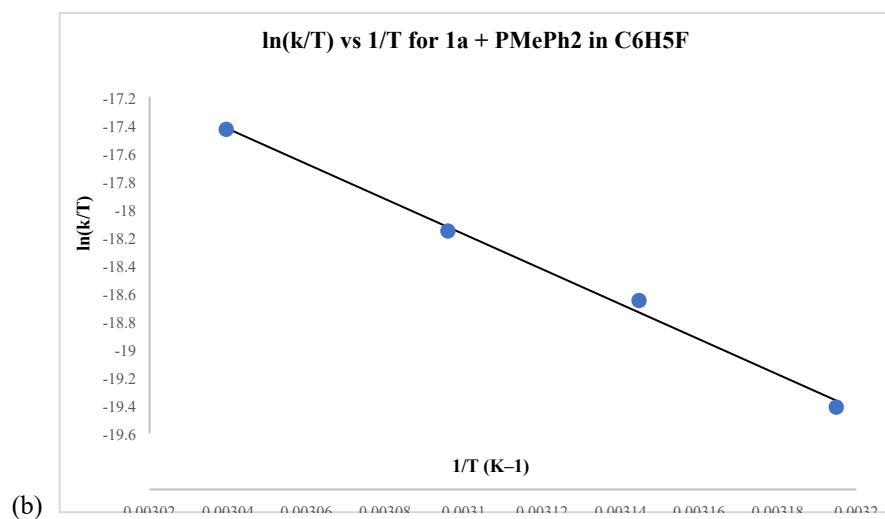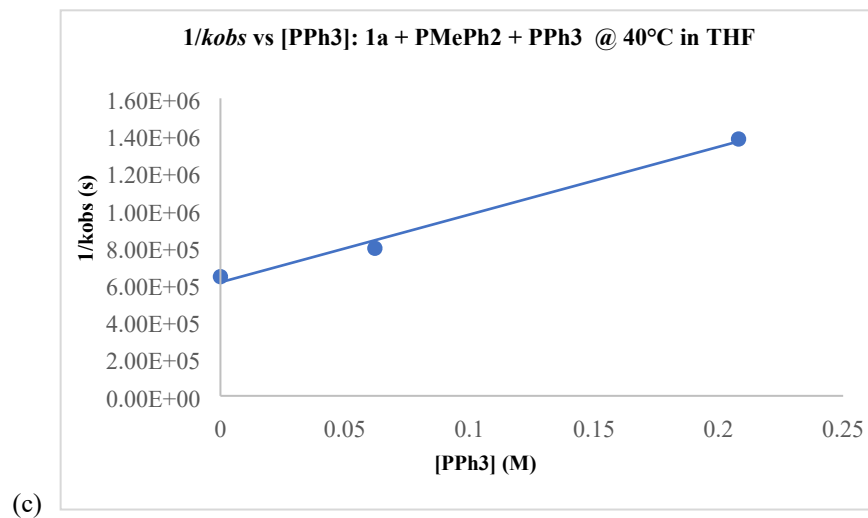

**Figure S13:** Eyring plots for the reaction between **1a** and PMePh<sub>2</sub> (a) in THF/10% C<sub>6</sub>D<sub>6</sub>; (b) in C<sub>6</sub>H<sub>5</sub>F/10% C<sub>6</sub>D<sub>6</sub> and (c) Plot of 1/k<sub>obs</sub> vs [PPh<sub>3</sub>] at 40°C in THF/10% C<sub>6</sub>D<sub>6</sub>.

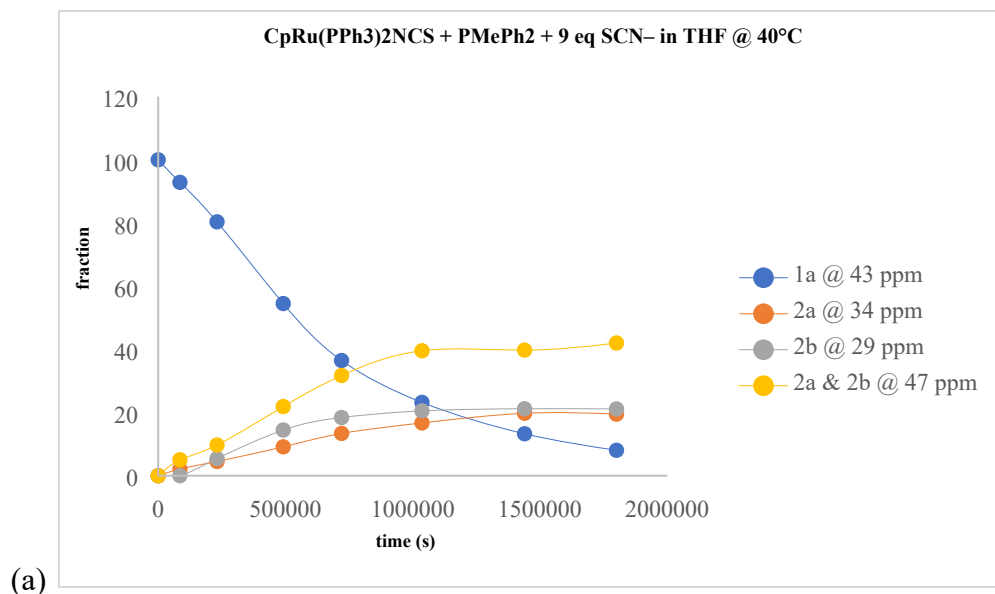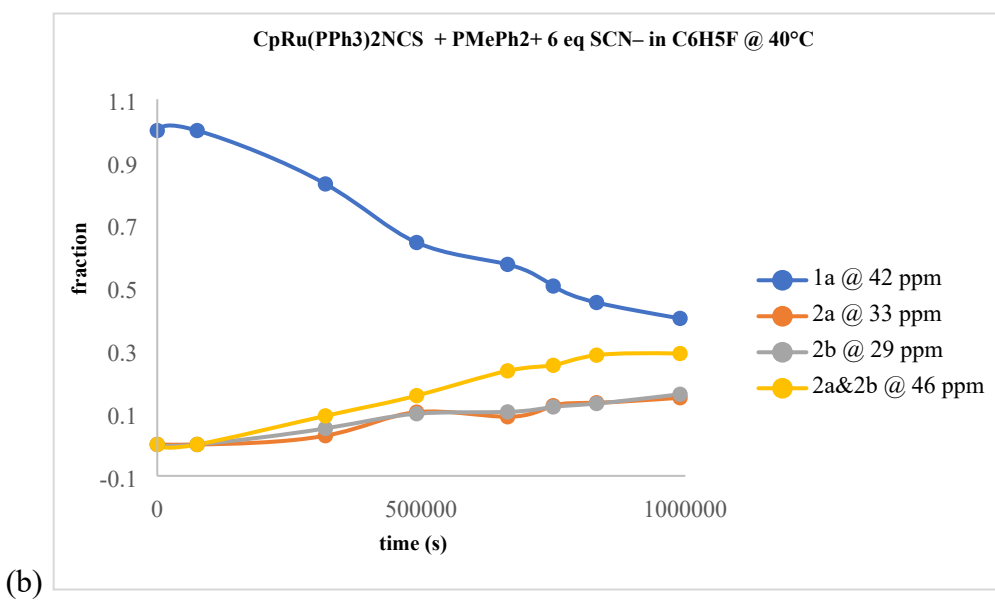

**Figure S14:** Concentration Changes in the Reaction Between **1a**, PMePh<sub>2</sub>, and SCN<sup>-</sup> @ 40°C in (a) THF/10% C<sub>6</sub>D<sub>6</sub> and (b) in C<sub>6</sub>H<sub>5</sub>F/10% C<sub>6</sub>D<sub>6</sub>.

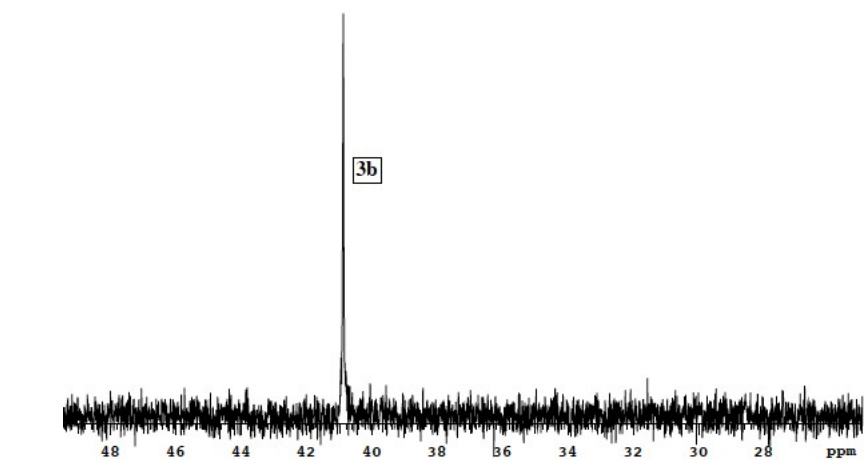

(a)

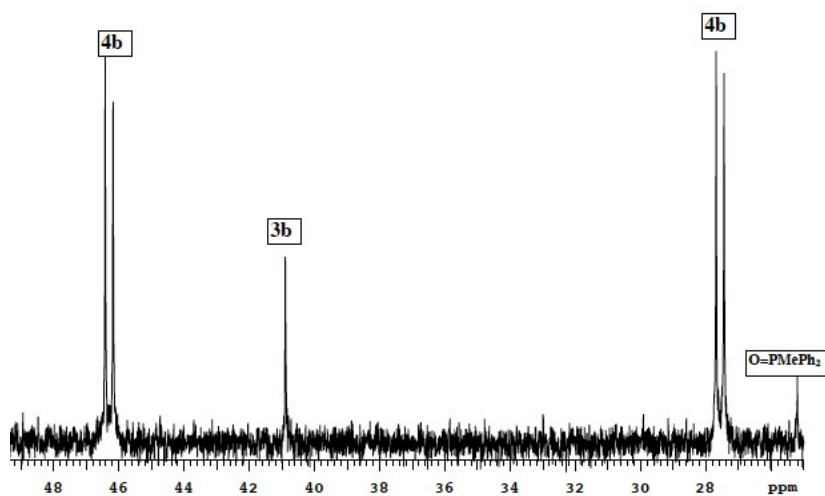

(b)

**Figure S15:** (a)  $^{31}\text{P}$  NMR spectrum of **3b** (5.7 mM) +  $\text{PMePh}_2$  (50 mM) in  $\text{C}_6\text{H}_5\text{F}/10\%$  v/v  $\text{C}_6\text{D}_6$  at  $t=0$ ; (b)  $^{31}\text{P}$  NMR spectrum of **3b** +  $\text{PMePh}_2$  in  $\text{C}_6\text{H}_5\text{F}/10\%$  v/v  $\text{C}_6\text{D}_6$  after heating at  $30^\circ\text{C}$  for 37.7 h showing 90% conversion to **4b**.

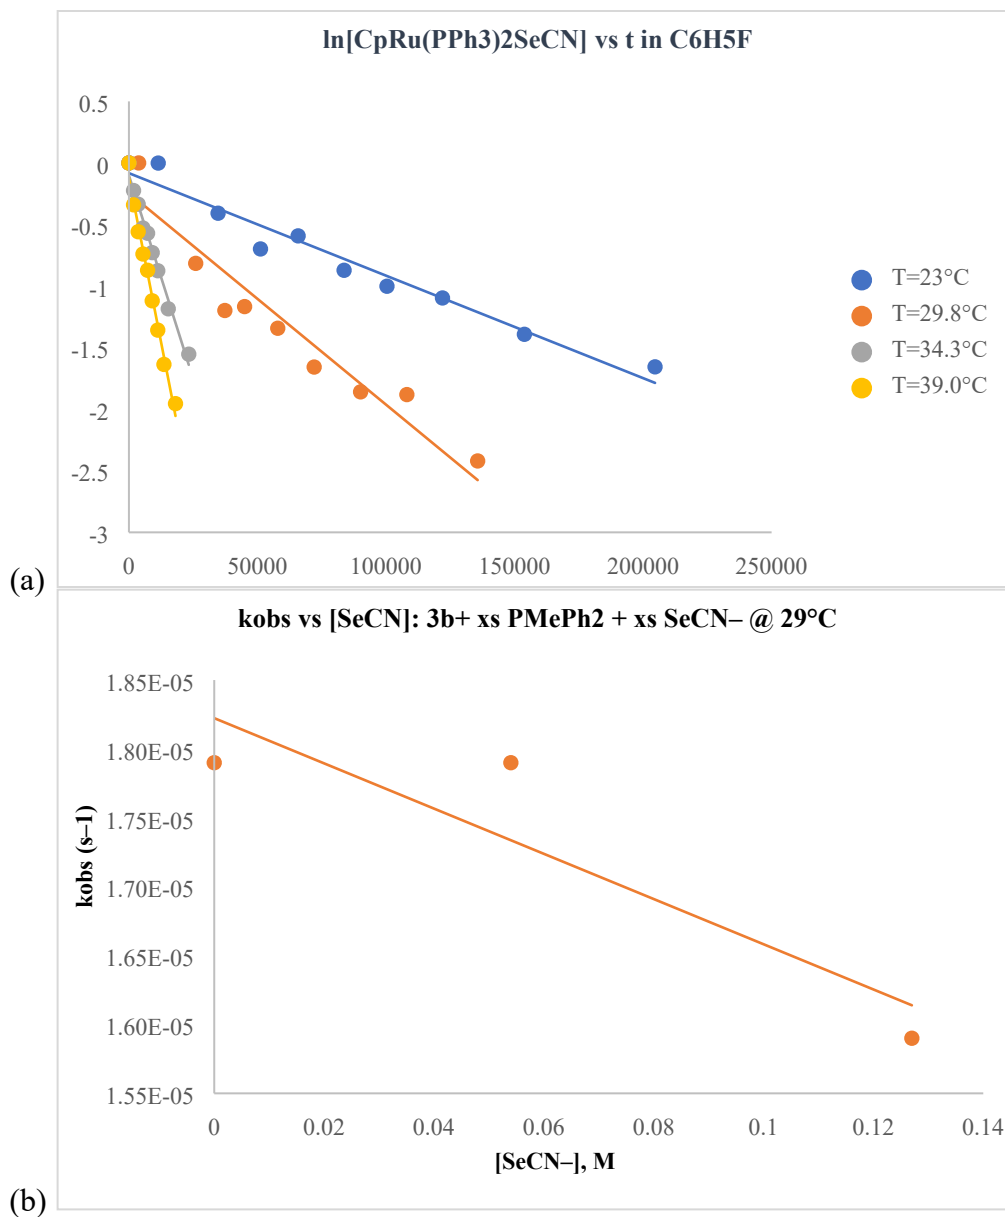

**Figure S16:** Representative plots of (a)  $\ln[\text{CpRu}(\text{PPh}_3)_2\text{SeCN}]$  vs  $t$  for the reaction between **3b** and  $\text{PMePh}_2$  in  $\text{C}_6\text{H}_5\text{F}/10\% \text{C}_6\text{D}_6$  and (b)  $k_{obs}$  vs  $[\text{SeCN}^-]$  @  $29^\circ\text{C}$

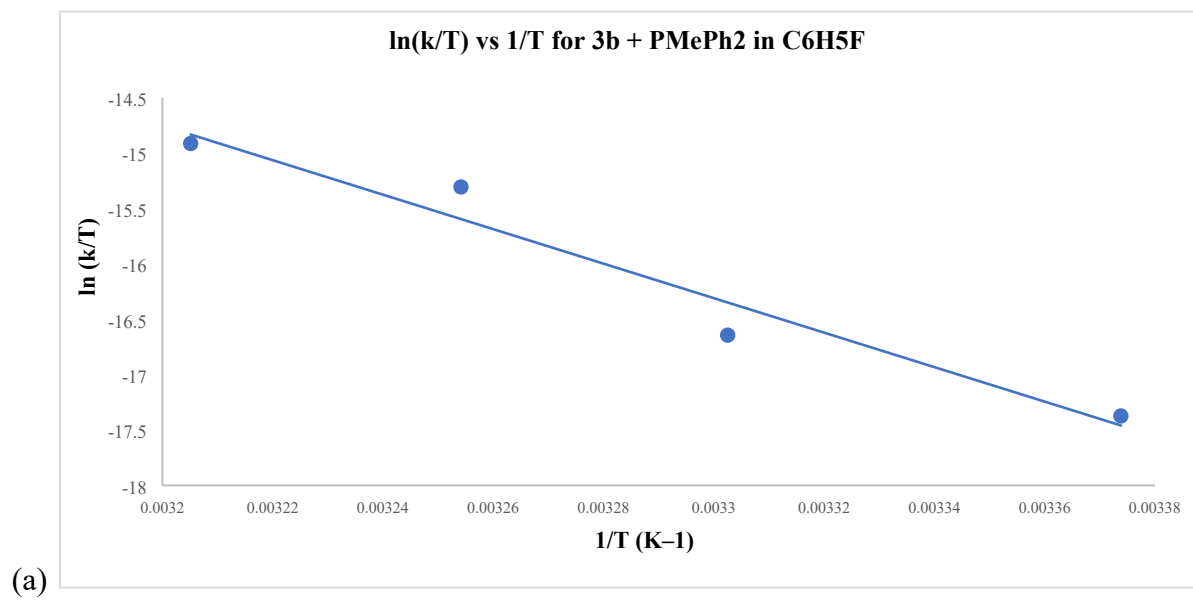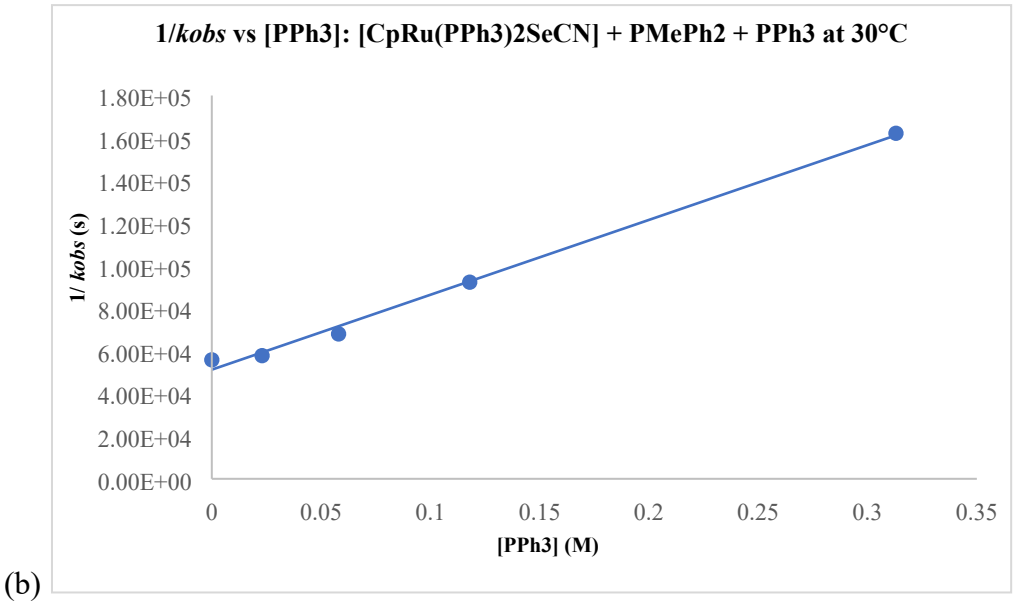

**Figure S17:** (a) Eyring plots for the reaction between **3b** and PMePh<sub>2</sub> in C<sub>6</sub>H<sub>5</sub>F/10% C<sub>6</sub>D<sub>6</sub> and (b) Plot of 1/k<sub>obs</sub> vs [PPh<sub>3</sub>]



**Table S1:** Concentrations of reactants and products: CpRu(PPh<sub>3</sub>)<sub>2</sub>NCS (**1a**) + PMePh<sub>2</sub> in THF/C<sub>6</sub>D<sub>6</sub> @ 40°C (see Figure S10 for plots)

| <b>Table S1a:</b> CpRu(PPh <sub>3</sub> ) <sub>2</sub> NCS ( <b>1a</b> ) + PMePh <sub>2</sub> in THF/C <sub>6</sub> D <sub>6</sub> @ 40°C |                           |                    |                    |                    |       |
|-------------------------------------------------------------------------------------------------------------------------------------------|---------------------------|--------------------|--------------------|--------------------|-------|
| t (s)                                                                                                                                     | δ 46 ( <b>2a&amp;2b</b> ) | δ 42 ( <b>1a</b> ) | δ 33 ( <b>2a</b> ) | δ 29 ( <b>2b</b> ) | total |
| 0                                                                                                                                         | 0                         | 100                | 0                  | 0                  | 100   |
| 85440                                                                                                                                     | 3.8                       | 92.96              | 3.24               | 0.56               | 100   |
| 231240                                                                                                                                    | 10.94                     | 78.36              | 10.7               | 0.24               | 100   |
| 491280                                                                                                                                    | 24.97                     | 50.06              | 23.01              | 1.96               | 100   |
| 720480                                                                                                                                    | 34.13                     | 31.75              | 30.33              | 3.80               | 100   |
| 1036440                                                                                                                                   | 39.39                     | 21.22              | 33.30              | 6.09               | 100   |
| 1439520                                                                                                                                   | 43.45                     | 13.11              | 37.49              | 5.95               | 100   |
| 1800720                                                                                                                                   | 46.47                     | 7.06               | 44.23              | 2.25               | 100   |

| <b>Table S1b:</b> CpRu(PPh <sub>3</sub> ) <sub>2</sub> NCS ( <b>1a</b> ) + PMePh <sub>2</sub> + 9 eq SCN <sup>-</sup> in THF/C <sub>6</sub> D <sub>6</sub> @ 40°C |                           |                    |                    |                    |       |
|-------------------------------------------------------------------------------------------------------------------------------------------------------------------|---------------------------|--------------------|--------------------|--------------------|-------|
| t (s)                                                                                                                                                             | δ 46 ( <b>2a&amp;2b</b> ) | δ 42 ( <b>1a</b> ) | δ 33 ( <b>2a</b> ) | δ 29 ( <b>2b</b> ) | total |
| 0                                                                                                                                                                 | 0                         | 100                | 0                  | 0                  | 100   |
| 85440                                                                                                                                                             | 5.03                      | 92.86              | 2.11               | 0                  | 100   |
| 231240                                                                                                                                                            | 9.72                      | 80.36              | 4.53               | 5.4                | 100   |
| 491280                                                                                                                                                            | 21.89                     | 54.5               | 9.14               | 14.47              | 100   |
| 720480                                                                                                                                                            | 31.73                     | 36.46              | 13.39              | 18.42              | 100   |
| 1036440                                                                                                                                                           | 39.56                     | 23.21              | 16.71              | 20.53              | 100   |
| 1439520                                                                                                                                                           | 42.30                     | 14.13              | 21.02              | 22.55              | 100   |
| 1800720                                                                                                                                                           | 46.33                     | 8.88               | 21.49              | 23.30              | 100   |

| <b>Table S1c:</b> CpRu(PPh <sub>3</sub> ) <sub>2</sub> NCS ( <b>1a</b> ) + PMePh <sub>2</sub> + 21 eq SCN <sup>-</sup> in THF/C <sub>6</sub> D <sub>6</sub> @ 40°C |                           |                    |                    |                    |       |
|--------------------------------------------------------------------------------------------------------------------------------------------------------------------|---------------------------|--------------------|--------------------|--------------------|-------|
| t (s)                                                                                                                                                              | δ 46 ( <b>2a&amp;2b</b> ) | δ 42 ( <b>1a</b> ) | δ 33 ( <b>2a</b> ) | δ 29 ( <b>2b</b> ) | total |
| 85440                                                                                                                                                              | 0                         | 100                | 0                  | 0                  | 100   |
| 231240                                                                                                                                                             | 13.53                     | 76.32              | 3.22               | 6.93               | 100   |
| 491280                                                                                                                                                             | 23.53                     | 53.31              | 8.52               | 14.64              | 100   |
| 720480                                                                                                                                                             | 29.86                     | 38.13              | 9.58               | 22.43              | 100   |
| 1036440                                                                                                                                                            | 37.38                     | 27.24              | 12.83              | 22.55              | 100   |
| 1439520                                                                                                                                                            | 41.80                     | 16.83              | 14.88              | 26.50              | 100   |
| 1800720                                                                                                                                                            | 44.50                     | 10.86              | 17.37              | 27.27              | 100   |

| <b>Table S2:</b> Rate Constants for the Reaction Between <b>1a</b> and $\text{PMe}_2\text{Ph}$ in THF containing 10% $\text{C}_6\text{D}_6$ |                    |                           |                         |                         |                                                  |
|---------------------------------------------------------------------------------------------------------------------------------------------|--------------------|---------------------------|-------------------------|-------------------------|--------------------------------------------------|
| T (°C)                                                                                                                                      | [ <b>1a</b> ] (mM) | [ $\text{PMePh}_2$ ] (mM) | [ $\text{PPh}_3$ ] (mM) | [ $\text{SCN}^-$ ] (mM) | $k_{\text{obs}}$ ( $\text{s}^{-1} \times 10^6$ ) |
| 40                                                                                                                                          | 8                  | 128                       | 0                       | 0                       | 1.35±0.24                                        |
| 45                                                                                                                                          | 8                  | 128                       | 0                       | 0                       | 2.00±0.07                                        |
| 50                                                                                                                                          | 8                  | 128                       | 0                       | 0                       | 3.14±0.09                                        |
| 55                                                                                                                                          | 8                  | 128                       | 0                       | 0                       | 4.56±0.40                                        |
| 40                                                                                                                                          | 7                  | 76                        | 0                       | 0                       | 1.56                                             |
| 40                                                                                                                                          | 7                  | 321                       | 0                       | 0                       | 1.59                                             |
| 40                                                                                                                                          | 7                  | 76                        | 62                      | 0                       | 1.22                                             |
| 40                                                                                                                                          | 7                  | 76                        | 208                     | 0                       | 0.724                                            |
| 40                                                                                                                                          | 7                  | 76                        | 0                       | 64                      | 1.41                                             |
| 40                                                                                                                                          | 7                  | 76                        | 0                       | 150                     | 1.40                                             |

| <b>Table S3:</b> Rate Constants for the Reaction Between <b>3b</b> and $\text{PMe}_2\text{Ph}$ in $\text{C}_6\text{H}_5\text{F}$ containing 10% $\text{C}_6\text{D}_6$ |                    |                           |                         |                          |                                                  |
|------------------------------------------------------------------------------------------------------------------------------------------------------------------------|--------------------|---------------------------|-------------------------|--------------------------|--------------------------------------------------|
| T (°C)                                                                                                                                                                 | [ <b>3b</b> ] (mM) | [ $\text{PMePh}_2$ ] (mM) | [ $\text{PPh}_3$ ] (mM) | [ $\text{SeCN}^-$ ] (mM) | $k_{\text{obs}}$ ( $\text{s}^{-1} \times 10^6$ ) |
| 23.4                                                                                                                                                                   | 5.7                | 50                        | 0                       | 0                        | 8.45±0.3                                         |
| 29.8                                                                                                                                                                   | 5.7                | 50                        | 0                       | 0                        | 17.9±0.4                                         |
| 34.3                                                                                                                                                                   | 5.7                | 50                        | 0                       | 0                        | 69.2±6                                           |
| 39.0                                                                                                                                                                   | 5.7                | 50                        | 0                       | 0                        | 104±4                                            |
| 29.8                                                                                                                                                                   | 5.7                | 50                        | 23                      | 0                        | 17.3                                             |
| 29.8                                                                                                                                                                   | 5.7                | 50                        | 58                      | 0                        | 14.7                                             |
| 29.8                                                                                                                                                                   | 5.7                | 50                        | 118                     | 0                        | 10.8                                             |
| 29.8                                                                                                                                                                   | 5.7                | 50                        | 313                     | 0                        | 6.16                                             |
| 29.8                                                                                                                                                                   | 5.7                | 50                        | 0                       | 54                       | 17.9                                             |
| 29.8                                                                                                                                                                   | 5.7                | 50                        | 0                       | 127                      | 15.9                                             |

| <b>Table S4. Sample and crystal data for 1a.</b> |                                      |                     |
|--------------------------------------------------|--------------------------------------|---------------------|
| <b>Identification code</b>                       | RK1_83_a, CCDC 2282637               |                     |
| <b>Chemical formula</b>                          | $C_{42}H_{35}NP_2RuS \cdot CH_2Cl_2$ |                     |
| <b>Formula weight</b>                            | 833.71 g/mol                         |                     |
| <b>Temperature</b>                               | 100(2) K                             |                     |
| <b>Wavelength</b>                                | 0.71073 Å                            |                     |
| <b>Crystal size</b>                              | 0.200 x 0.200 x 0.150 mm             |                     |
| <b>Crystal habit</b>                             | Intense yellow block                 |                     |
| <b>Crystal system</b>                            | orthorhombic                         |                     |
| <b>Space group</b>                               | Pna2 <sub>1</sub>                    |                     |
| <b>Unit cell dimensions</b>                      | a = 20.3288(10) Å                    | $\alpha = 90^\circ$ |
|                                                  | b = 20.6729(10) Å                    | $\beta = 90^\circ$  |
|                                                  | c = 8.8263(4) Å                      | $\gamma = 90^\circ$ |
| <b>Volume</b>                                    | 3709.3 Å <sup>3</sup>                |                     |
| <b>Z</b>                                         | 4                                    |                     |
| <b>Density (calculated)</b>                      | 1.493 g/cm <sup>3</sup>              |                     |
| <b>Absorption coefficient</b>                    | 0.742 mm <sup>-1</sup>               |                     |
| <b>F(000)</b>                                    | 1704                                 |                     |

| <b>Table S5. Data collection and structure refinement for 1a.</b> |                                                                                                                            |                              |
|-------------------------------------------------------------------|----------------------------------------------------------------------------------------------------------------------------|------------------------------|
| <b>Theta range for data collection</b>                            | 2.811 to 25.405°                                                                                                           |                              |
| <b>Index ranges</b>                                               | -24<=h<=24, -24<=k<=24, -10<=l<=10                                                                                         |                              |
| <b>Reflections collected</b>                                      | 9555                                                                                                                       |                              |
| <b>Independent reflections</b>                                    | 6820 [R(int) = 0.0682]                                                                                                     |                              |
| <b>Coverage of independent reflections</b>                        | 99.7%                                                                                                                      |                              |
| <b>Absorption correction</b>                                      | Multi-Scan                                                                                                                 |                              |
| <b>Max. and min. transmission</b>                                 | 0.866 and 0.897                                                                                                            |                              |
| <b>Structure solution technique</b>                               | direct methods                                                                                                             |                              |
| <b>Structure solution program</b>                                 | SHELXL-2018/2 (Sheldrick, 2018)                                                                                            |                              |
| <b>Refinement method</b>                                          | Full-matrix least-squares on F <sup>2</sup>                                                                                |                              |
| <b>Refinement program</b>                                         | SHELXL-2018/3 (Sheldrick, 2018)                                                                                            |                              |
| <b>Function minimized</b>                                         | $\Sigma w(F_o^2 - F_c^2)^2$                                                                                                |                              |
| <b>Data / restraints / parameters</b>                             | 6820 / 0 / 452                                                                                                             |                              |
| <b>Goodness-of-fit on F<sup>2</sup></b>                           | 1.204                                                                                                                      |                              |
| <b><math>\Delta/\sigma_{\max}</math></b>                          | 0.000                                                                                                                      |                              |
| <b>Final R indices</b>                                            | 6820 data;<br>I>2 $\sigma$ (I)                                                                                             | R1 = 0.0330, wR2 =<br>0.0653 |
|                                                                   | all data                                                                                                                   | R1 = 0.0429, wR2 =<br>0.0751 |
| <b>Weighting scheme</b>                                           | w=1/[ $\sigma^2(F_o^2)+(0.0067P)^2 + 10.1039P$ ]<br>where P=(F <sub>o</sub> <sup>2</sup> +2F <sub>c</sub> <sup>2</sup> )/3 |                              |
| <b>Largest diff. peak and hole</b>                                | 1.024 and -0.573 eÅ <sup>-3</sup>                                                                                          |                              |

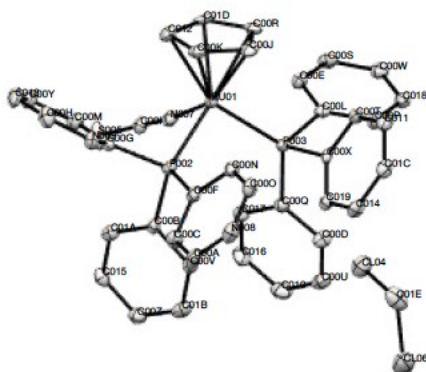

**Table S6. Bond lengths (Å) for 1a.**

|           |            |           |          |           |           |
|-----------|------------|-----------|----------|-----------|-----------|
| Ru01 N007 | 2.064(5)   | C00H C013 | 1.388(9) | C00Y C013 | 1.389(9)  |
| Ru01 C01D | 2.215(6)   | C00H N009 | 1.396(8) | C00Y H00Y | 0.9500    |
| Ru01 C00K | 2.216(6)   | C00H H00H | 0.9500   | C00Z C015 | 1.381(10) |
| Ru01 C012 | 2.219(6)   | C00J C00K | 1.419(8) | C00Z C01B | 1.391(8)  |
| Ru01 C00J | 2.230(6)   | C00J C00R | 1.456(8) | C00Z H00Z | 0.9500    |
| Ru01 C00R | 2.230(6)   | C00J H00J | 0.9500   | C01A C015 | 1.388(8)  |
| Ru01 P003 | 2.3127(15) | C00K C012 | 1.424(9) | C01A H01A | 0.9500    |
| Ru01 P002 | 2.3169(15) | C00K H00K | 0.9500   | C01B H01B | 0.9500    |
| S005 C00I | 1.629(6)   | C00L C00P | 1.410(8) | C01C C014 | 1.391(8)  |
| P002 C00F | 1.827(6)   | C00M C00Y | 1.384(8) | C01C C011 | 1.401(8)  |
| P002 C00B | 1.836(6)   | C00M H00M | 0.9500   | C01C H01C | 0.9500    |
| P002 C00G | 1.843(6)   | C00N C00O | 1.397(8) | C01D C012 | 1.438(9)  |
| P003 C00X | 1.830(6)   | C00N H00N | 0.9500   | C01D H01D | 0.9500    |
| P003 C00L | 1.836(6)   | C00O N008 | 1.379(9) | C010 C016 | 1.387(9)  |
| P003 C00Q | 1.844(6)   | C00O H00O | 0.9500   | C010 H010 | 0.9500    |
| N007 C00I | 1.162(7)   | C00P C018 | 1.392(8) | C011 H011 | 0.9500    |
| C00A N008 | 1.387(8)   | C00P H00P | 0.9500   | C012 H012 | 0.9500    |
| C00A C00C | 1.394(9)   | C00Q C017 | 1.404(8) | C013 H013 | 0.9500    |
| C00A H00A | 0.9500     | C00R C01D | 1.413(9) | C014 C019 | 1.386(8)  |
| C00B C01A | 1.386(8)   | C00R H00R | 0.9500   | C014 H014 | 0.9500    |
| C00B C00V | 1.407(8)   | C00S C00W | 1.383(9) | C015 H015 | 0.9500    |
| C00C C00F | 1.404(8)   | C00S H00S | 0.9500   | C016 C017 | 1.385(9)  |
| C00C H00C | 0.9500     | C00T C011 | 1.383(8) | C016 H016 | 0.9500    |
| C00D C00U | 1.372(8)   | C00T C00X | 1.408(8) | C017 H017 | 0.9500    |
| C00D C00Q | 1.396(8)   | C00T H00T | 0.9500   | C018 H018 | 0.9500    |

|           |          |           |          |           |          |
|-----------|----------|-----------|----------|-----------|----------|
| C00D H00D | 0.9500   | C00U C010 | 1.393(9) | C019 H019 | 0.9500   |
| C00E C00L | 1.398(8) | C00U H00U | 0.9500   | N008 H    | 0.9500   |
| C00E C00S | 1.399(8) | C00V C01B | 1.386(8) | N009 HA   | 0.9500   |
| C00E H00E | 0.9500   | C00V H00V | 0.9500   | C104 C01E | 1.756(7) |
| C00F C00N | 1.390(8) | C00W C018 | 1.389(9) | C106 C01E | 1.763(7) |
| C00G N009 | 1.395(8) | C00W H00W | 0.9500   | C01E H01E | 0.9900   |
| C00G C00M | 1.407(8) | C00X C019 | 1.398(8) | C01E H01F | 0.9900   |

|                |            |                |          |
|----------------|------------|----------------|----------|
| N007 Ru01 C01D | 90.8(2)    | C00D C00Q C017 | 118.7(5) |
| N007 Ru01 C00K | 133.1(2)   | C00D C00Q P003 | 122.9(4) |
| C01D Ru01 C00K | 62.5(2)    | C017 C00Q P003 | 117.9(4) |
| N007 Ru01 C012 | 97.9(2)    | C01D C00R C00J | 108.4(5) |
| C01D Ru01 C012 | 37.8(2)    | C01D C00R Ru01 | 70.9(3)  |
| C00K Ru01 C012 | 37.5(2)    | C00J C00R Ru01 | 70.9(3)  |
| N007 Ru01 C00J | 153.9(2)   | C01D C00R H00R | 125.8    |
| C01D Ru01 C00J | 63.1(2)    | C00J C00R H00R | 125.8    |
| C00K Ru01 C00J | 37.2(2)    | Ru01 C00R H00R | 124.0    |
| C012 Ru01 C00J | 63.1(2)    | C00W C00S C00E | 120.3(6) |
| N007 Ru01 C00R | 118.5(2)   | C00W C00S H00S | 119.8    |
| C01D Ru01 C00R | 37.1(2)    | C00E C00S H00S | 119.8    |
| C00K Ru01 C00R | 62.3(2)    | C011 C00T C00X | 120.2(5) |
| C012 Ru01 C00R | 62.7(2)    | C011 C00T H00T | 119.9    |
| C00J Ru01 C00R | 38.1(2)    | C00X C00T H00T | 119.9    |
| N007 Ru01 P003 | 94.55(13)  | C00D C00U C010 | 121.1(6) |
| C01D Ru01 P003 | 120.58(17) | C00D C00U H00U | 119.4    |
| C00K Ru01 P003 | 131.86(16) | C010 C00U H00U | 119.4    |
| C012 Ru01 P003 | 154.86(16) | C01B C00V C00B | 121.3(6) |
| C00J Ru01 P003 | 97.40(16)  | C01B C00V H00V | 119.3    |
| C00R Ru01 P003 | 92.19(16)  | C00B C00V H00V | 119.3    |
| N007 Ru01 P002 | 87.22(14)  | C00S C00W C018 | 119.9(5) |
| C01D Ru01 P002 | 140.63(17) | C00S C00W H00W | 120.1    |
| C00K Ru01 P002 | 91.10(16)  | C018 C00W H00W | 120.1    |
| C012 Ru01 P002 | 103.59(17) | C019 C00X C00T | 118.3(5) |
| C00J Ru01 P002 | 113.58(17) | C019 C00X P003 | 121.1(4) |
| C00R Ru01 P002 | 151.19(16) | C00T C00X P003 | 120.0(4) |
| P003 Ru01 P002 | 98.76(5)   | C00M C00Y C013 | 120.1(6) |
| C00F P002 C00B | 101.2(3)   | C00M C00Y H00Y | 120.0    |
| C00F P002 C00G | 102.6(3)   | C013 C00Y H00Y | 120.0    |
| C00B P002 C00G | 104.6(3)   | C015 C00Z C01B | 119.3(6) |
| C00F P002 Ru01 | 119.7(2)   | C015 C00Z H00Z | 120.3    |
| C00B P002 Ru01 | 120.25(19) | C01B C00Z H00Z | 120.3    |
| C00G P002 Ru01 | 106.39(18) | C00B C01A C015 | 120.9(6) |
| C00X P003 C00L | 102.7(3)   | C00B C01A H01A | 119.6    |

|                |            |                |          |
|----------------|------------|----------------|----------|
| C00X P003 C00Q | 104.9(3)   | C015 C01A H01A | 119.6    |
| C00L P003 C00Q | 95.2(3)    | C00V C01B C00Z | 119.8(6) |
| C00X P003 Ru01 | 111.73(18) | C00V C01B H01B | 120.1    |
| C00L P003 Ru01 | 114.68(19) | C00Z C01B H01B | 120.1    |
| C00Q P003 Ru01 | 124.50(19) | C014 C01C C011 | 119.2(5) |
| C00I N007 Ru01 | 168.8(4)   | C014 C01C H01C | 120.4    |
| N008 C00A C00C | 120.6(7)   | C011 C01C H01C | 120.4    |
| N008 C00A H00A | 119.7      | C00R C01D C012 | 108.5(5) |
| C00C C00A H00A | 119.7      | C00R C01D Ru01 | 72.0(3)  |
| C01A C00B C00V | 117.8(5)   | C012 C01D Ru01 | 71.2(3)  |
| C01A C00B P002 | 123.9(5)   | C00R C01D H01D | 125.8    |
| C00V C00B P002 | 118.2(4)   | C012 C01D H01D | 125.8    |
| C00A C00C C00F | 119.9(6)   | Ru01 C01D H01D | 122.7    |
| C00A C00C H00C | 120.0      | C016 C010 C00U | 118.4(6) |
| C00F C00C H00C | 120.0      | C016 C010 H010 | 120.8    |
| C00U C00D C00Q | 120.6(6)   | C00U C010 H010 | 120.8    |
| C00U C00D H00D | 119.7      | C00T C011 C01C | 120.8(6) |
| C00Q C00D H00D | 119.7      | C00T C011 H011 | 119.6    |
| C00L C00E C00S | 120.6(5)   | C01C C011 H011 | 119.6    |
| C00L C00E H00E | 119.7      | C00K C012 C01D | 106.9(5) |
| C00S C00E H00E | 119.7      | C00K C012 Ru01 | 71.2(3)  |
| C00N C00F C00C | 118.7(6)   | C01D C012 Ru01 | 71.0(3)  |
| C00N C00F P002 | 120.2(5)   | C00K C012 H012 | 126.5    |
| C00C C00F P002 | 121.2(5)   | C01D C012 H012 | 126.5    |
| N009 C00G C00M | 117.5(5)   | Ru01 C012 H012 | 123.0    |
| N009 C00G P002 | 122.7(4)   | C00H C013 C00Y | 120.1(6) |
| C00M C00G P002 | 119.6(4)   | C00H C013 H013 | 120.0    |
| C013 C00H N009 | 119.3(6)   | C00Y C013 H013 | 120.0    |
| C013 C00H H00H | 120.3      | C019 C014 C01C | 120.0(6) |
| N009 C00H H00H | 120.3      | C019 C014 H014 | 120.0    |
| N007 C00I S005 | 179.1(6)   | C01C C014 H014 | 120.0    |
| C00K C00J C00R | 106.2(5)   | C00Z C015 C01A | 120.9(6) |
| C00K C00J Ru01 | 70.9(3)    | C00Z C015 H015 | 119.6    |
| C00R C00J Ru01 | 71.0(3)    | C01A C015 H015 | 119.6    |
| C00K C00J H00J | 126.9      | C017 C016 C010 | 121.3(6) |
| C00R C00J H00J | 126.9      | C017 C016 H016 | 119.3    |



|                |          |                |          |
|----------------|----------|----------------|----------|
| Ru01 C00J H00J | 123.0    | C010 C016 H016 | 119.3    |
| C00J C00K C012 | 110.0(5) | C016 C017 C00Q | 119.7(6) |
| C00J C00K Ru01 | 71.9(3)  | C016 C017 H017 | 120.1    |
| C012 C00K Ru01 | 71.4(3)  | C00Q C017 H017 | 120.1    |
| C00J C00K H00K | 125.0    | C00W C018 C00P | 120.3(6) |
| C012 C00K H00K | 125.0    | C00W C018 H018 | 119.8    |
| Ru01 C00K H00K | 123.3    | C00P C018 H018 | 119.8    |
| C00E C00L C00P | 118.4(5) | C014 C019 C00X | 121.4(6) |
| C00E C00L P003 | 119.8(4) | C014 C019 H019 | 119.3    |
| C00P C00L P003 | 121.1(5) | C00X C019 H019 | 119.3    |
| C00Y C00M C00G | 121.2(5) | C00O N008 C00A | 119.8(6) |
| C00Y C00M H00M | 119.4    | C00O N008 H    | 120.1    |
| C00G C00M H00M | 119.4    | C00A N008 H    | 120.1    |
| C00F C00N C00O | 121.0(6) | C00G N009 C00H | 121.7(6) |
| C00F C00N H00N | 119.5    | C00G N009 HA   | 119.1    |
| C00O C00N H00N | 119.5    | C00H N009 HA   | 119.1    |
| N008 C00O C00N | 119.9(6) | Cl04 C01E Cl06 | 111.8(4) |
| N008 C00O H00O | 120.0    | Cl04 C01E H01E | 109.2    |
| C00N C00O H00O | 120.0    | Cl06 C01E H01E | 109.2    |
| C018 C00P C00L | 120.5(6) | Cl04 C01E H01F | 109.2    |
| C018 C00P H00P | 119.8    | Cl06 C01E H01F | 109.2    |
| C00L C00P H00P | 119.8    | H01E C01E H01F | 107.9    |

| <b>Table S8. Sample and crystal data for 2a.</b> |                                                     |                             |
|--------------------------------------------------|-----------------------------------------------------|-----------------------------|
| <b>Identification code</b>                       | TH110521_RK2_0m_a, CCDC 2282638                     |                             |
| <b>Chemical formula</b>                          | C <sub>37</sub> H <sub>33</sub> NP <sub>2</sub> RuS |                             |
| <b>Formula weight</b>                            | 772.04 g/mol                                        |                             |
| <b>Temperature</b>                               | 100(2) K                                            |                             |
| <b>Wavelength</b>                                | 0.71073 Å                                           |                             |
| <b>Crystal size</b>                              | 0.200 x 0.150 x 0.080 mm                            |                             |
| <b>Crystal habit</b>                             | clear light yellow prism                            |                             |
| <b>Crystal system</b>                            | triclinic                                           |                             |
| <b>Space group</b>                               | P -1                                                |                             |
| <b>Unit cell dimensions</b>                      | a = 12.3722(4) Å                                    | $\alpha = 91.665(2)^\circ$  |
|                                                  | b = 12.6828(4) Å                                    | $\beta = 115.605(2)^\circ$  |
|                                                  | c = 13.5552(4) Å                                    | $\gamma = 112.079(2)^\circ$ |
| <b>Volume</b>                                    | 1730.16(10) Å <sup>3</sup>                          |                             |
| <b>Z</b>                                         | 2                                                   |                             |
| <b>Density (calculated)</b>                      | 1.483 g/cm <sup>3</sup>                             |                             |
| <b>Absorption coefficient</b>                    | 0.789 mm <sup>-1</sup>                              |                             |
| <b>F(000)</b>                                    | 788                                                 |                             |

| <b>Table S9. Data collection and structure refinement for 2a.</b> |                                                                                                                                                                    |                              |
|-------------------------------------------------------------------|--------------------------------------------------------------------------------------------------------------------------------------------------------------------|------------------------------|
| <b>Theta range for data collection</b>                            | 2.738 to 26.616°                                                                                                                                                   |                              |
| <b>Index ranges</b>                                               | -15<=h<=15, -15<=k<=15, -17<=l<=17                                                                                                                                 |                              |
| <b>Reflections collected</b>                                      | 78119                                                                                                                                                              |                              |
| <b>Independent reflections</b>                                    | 7223 [R(int) = 0.0453]                                                                                                                                             |                              |
| <b>Coverage of independent reflections</b>                        | 99.5%                                                                                                                                                              |                              |
| <b>Absorption correction</b>                                      | Multi-Scan                                                                                                                                                         |                              |
| <b>Max. and min. transmission</b>                                 | 0.833 and 0.928                                                                                                                                                    |                              |
| <b>Structure solution technique</b>                               | direct methods                                                                                                                                                     |                              |
| <b>Structure solution program</b>                                 | SHELXL-2018/2 (Sheldrick, 2018)                                                                                                                                    |                              |
| <b>Refinement method</b>                                          | Full-matrix least-squares on F <sup>2</sup>                                                                                                                        |                              |
| <b>Refinement program</b>                                         | SHELXL-2018/3 (Sheldrick, 2018)                                                                                                                                    |                              |
| <b>Function minimized</b>                                         | $\Sigma w(F_o^2 - F_c^2)^2$                                                                                                                                        |                              |
| <b>Data / restraints / parameters</b>                             | 7223 / 0 / 407                                                                                                                                                     |                              |
| <b>Goodness-of-fit on F<sup>2</sup></b>                           | 1.089                                                                                                                                                              |                              |
| <b><math>\Delta/\sigma_{\max}</math></b>                          | 0.001                                                                                                                                                              |                              |
| <b>Final R indices</b>                                            | 7223 data;<br>I>2 $\sigma$ (I)                                                                                                                                     | R1 = 0.0428, wR2 =<br>0.0798 |
|                                                                   | all data                                                                                                                                                           | R1 = 0.0712, wR2 =<br>0.0957 |
| <b>Weighting scheme</b>                                           | w=1/[\sigma <sup>2</sup> (F <sub>o</sub> <sup>2</sup> )+(0.0170P) <sup>2</sup> +5.9748P]<br>where P=(F <sub>o</sub> <sup>2</sup> +2F <sub>c</sub> <sup>2</sup> )/3 |                              |
| <b>Largest diff. peak and hole</b>                                | 0.985 and -1.103 eÅ <sup>-3</sup>                                                                                                                                  |                              |

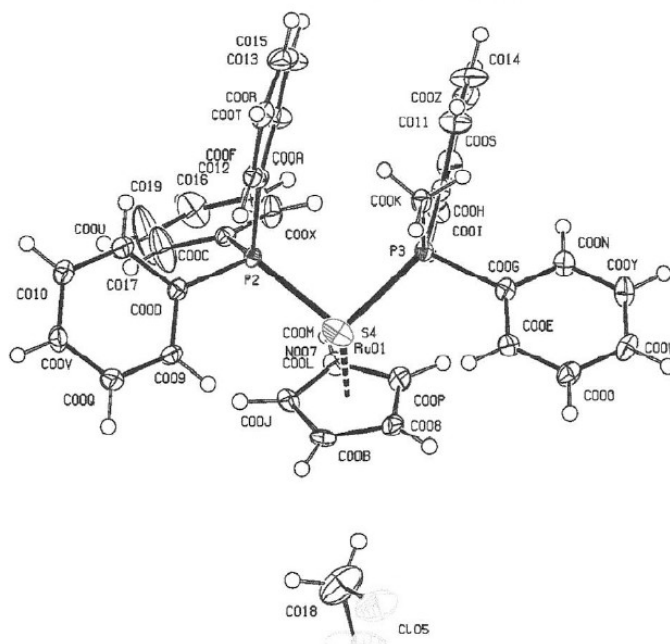

**Table S10. Bond lengths (Å) for 2a.**

|           |           |           |          |           |          |
|-----------|-----------|-----------|----------|-----------|----------|
| Ru01 N007 | 2.065(3)  | C008 C00P | 1.422(5) | C00L C00P | 1.417(5) |
| Ru01 C00L | 2.197(4)  | C008 C00B | 1.429(5) | C00N C00Y | 1.388(5) |
| Ru01 C00P | 2.201(3)  | C009 C00D | 1.385(5) | C00O C00W | 1.387(6) |
| Ru01 C00J | 2.227(3)  | C009 C00Q | 1.391(5) | C00Q C00V | 1.383(5) |
| Ru01 C008 | 2.233(4)  | C00A C00R | 1.393(5) | C00R C015 | 1.389(6) |
| Ru01 C00B | 2.236(3)  | C00A C00F | 1.397(5) | C00S C00Z | 1.385(6) |
| Ru01 P2   | 2.3078(9) | C00B C00J | 1.420(5) | C00T C013 | 1.383(6) |
| Ru01 P3   | 2.3161(9) | C00C C00X | 1.378(5) | C00U C010 | 1.383(5) |
| Cl05 C018 | 1.754(5)  | C00C C017 | 1.382(6) | C00V C010 | 1.382(6) |
| Cl06 C018 | 1.749(5)  | C00D C00U | 1.402(5) | C00W C00Y | 1.389(6) |
| S4 C00M   | 1.639(4)  | C00E C00O | 1.396(5) | C00Z C014 | 1.373(6) |
| P2 C00A   | 1.827(4)  | C00E C00G | 1.397(5) | C011 C014 | 1.391(6) |
| P2 C00D   | 1.832(4)  | C00F C00T | 1.389(5) | C012 C016 | 1.359(6) |
| P2 C00C   | 1.836(4)  | C00G C00N | 1.398(5) | C013 C015 | 1.382(6) |
| P3 C00K   | 1.825(4)  | C00H C011 | 1.389(5) | C016 C019 | 1.378(7) |
| P3 C00H   | 1.834(4)  | C00H C00I | 1.397(5) | C017 C019 | 1.391(6) |
| P3 C00G   | 1.843(4)  |           |          |           |          |
| N007 C00M | 1.156(5)  |           |          |           |          |

|                |            |                |          |
|----------------|------------|----------------|----------|
| N007 Ru01 C00L | 157.69(13) | C00J C00B Ru01 | 71.1(2)  |
| N007 Ru01 C00P | 137.44(13) | C008 C00B Ru01 | 71.2(2)  |
| C00L Ru01 C00P | 37.60(14)  | C00X C00C C017 | 117.9(4) |
| N007 Ru01 C00J | 121.31(13) | C00X C00C P2   | 118.5(3) |
| C00L Ru01 C00J | 37.82(14)  | C017 C00C P2   | 123.5(3) |
| C00P Ru01 C00J | 62.39(14)  | C009 C00D C00U | 118.3(3) |
| N007 Ru01 C008 | 102.78(13) | C009 C00D P2   | 121.5(3) |
| C00L Ru01 C008 | 62.99(14)  | C00U C00D P2   | 120.1(3) |
| C00P Ru01 C008 | 37.40(14)  | C00O C00E C00G | 121.1(4) |
| C00J Ru01 C008 | 62.31(14)  | C00T C00F C00A | 120.6(4) |
| N007 Ru01 C00B | 95.22(13)  | C00E C00G C00N | 118.3(3) |
| C00L Ru01 C00B | 62.88(14)  | C00E C00G P3   | 117.7(3) |
| C00P Ru01 C00B | 62.32(14)  | C00N C00G P3   | 123.7(3) |
| C00J Ru01 C00B | 37.11(13)  | C011 C00H C00I | 117.8(4) |
| C008 Ru01 C00B | 37.30(14)  | C011 C00H P3   | 122.4(3) |
| N007 Ru01 P2   | 87.91(8)   | C00I C00H P3   | 119.7(3) |
| C00L Ru01 P2   | 98.66(10)  | C00S C00I C00H | 121.4(4) |
| C00P Ru01 P2   | 134.17(11) | C00B C00J C00L | 108.2(3) |
| C00J Ru01 P2   | 91.39(10)  | C00B C00J Ru01 | 71.8(2)  |
| C008 Ru01 P2   | 153.53(10) | C00L C00J Ru01 | 69.9(2)  |
| C00B Ru01 P2   | 118.57(10) | C00P C00L C00J | 107.1(3) |
| N007 Ru01 P3   | 86.56(9)   | C00P C00L Ru01 | 71.3(2)  |
| C00L Ru01 P3   | 113.42(10) | C00J C00L Ru01 | 72.3(2)  |
| C00P Ru01 P3   | 92.57(10)  | N007 C00M S4   | 178.2(4) |
| C00J Ru01 P3   | 151.14(10) | C00Y C00N C00G | 120.4(4) |
| C008 Ru01 P3   | 107.19(10) | C00W C00O C00E | 119.9(4) |
| C00B Ru01 P3   | 143.95(10) | C00L C00P C008 | 109.2(3) |
| P2 Ru01 P3     | 97.46(3)   | C00L C00P Ru01 | 71.1(2)  |
| C00A P2 C00D   | 100.62(16) | C008 C00P Ru01 | 72.5(2)  |
| C00A P2 C00C   | 104.58(16) | C00V C00Q C009 | 120.2(4) |
| C00D P2 C00C   | 102.20(16) | C015 C00R C00A | 120.7(4) |
| C00A P2 Ru01   | 119.41(11) | C00I C00S C00Z | 119.9(4) |
| C00D P2 Ru01   | 115.18(12) | C013 C00T C00F | 120.1(4) |
| C00C P2 Ru01   | 112.73(12) | C010 C00U C00D | 120.8(4) |

|                |            |                |          |
|----------------|------------|----------------|----------|
| C00K P3 C00H   | 103.49(17) | C010 C00V C00Q | 119.7(4) |
| C00K P3 C00G   | 98.37(16)  | C00O C00W C00Y | 119.4(4) |
| C00H P3 C00G   | 102.71(16) | C00C C00X C012 | 121.9(4) |
| C00K P3 Ru01   | 118.70(12) | C00N C00Y C00W | 120.8(4) |
| C00H P3 Ru01   | 118.92(12) | C014 C00Z C00S | 119.5(4) |
| C00G P3 Ru01   | 111.66(12) | C00V C010 C00U | 120.2(4) |
| C00M N007 Ru01 | 173.8(3)   | C00H C011 C014 | 120.6(4) |
| C00P C008 C00B | 107.3(3)   | C016 C012 C00X | 120.3(4) |
| C00P C008 Ru01 | 70.1(2)    | C015 C013 C00T | 119.9(4) |
| C00B C008 Ru01 | 71.5(2)    | C00Z C014 C011 | 120.7(4) |
| C00D C009 C00Q | 120.8(3)   | C013 C015 C00R | 120.2(4) |
| C00R C00A C00F | 118.5(3)   | C012 C016 C019 | 118.6(4) |
| C00R C00A P2   | 122.6(3)   | C00C C017 C019 | 119.8(4) |
| C00F C00A P2   | 118.7(3)   | Cl06 C018 Cl05 | 113.4(3) |
| C00J C00B C008 | 108.1(3)   | C016 C019 C017 | 121.6(5) |

| <b>Table S12. Sample and crystal data for 3b.</b> |                                                      |                |
|---------------------------------------------------|------------------------------------------------------|----------------|
| <b>Identification code</b>                        | Kirss2, CCDC 2282639                                 |                |
| <b>Chemical formula</b>                           | C <sub>42</sub> H <sub>35</sub> NP <sub>2</sub> RuSe |                |
| <b>Formula weight</b>                             | 795.68 g/mol                                         |                |
| <b>Temperature</b>                                | 100.0(5) K                                           |                |
| <b>Wavelength</b>                                 | 0.71073 Å                                            |                |
| <b>Crystal size</b>                               | 0.320 x 0.170 x 0.020 mm                             |                |
| <b>Crystal habit</b>                              | Orange lath                                          |                |
| <b>Crystal system</b>                             | monoclinic                                           |                |
| <b>Space group</b>                                | P 2 <sub>1</sub> /c                                  |                |
| <b>Unit cell dimensions</b>                       | a = 18.2161(14) Å                                    | α = 90°        |
|                                                   | b = 10.9631(8) Å                                     | β = 114.698(2) |
|                                                   | c = 18.8210(15) Å                                    | γ = 90°        |
| <b>Volume</b>                                     | 3414.8(5) Å <sup>3</sup>                             |                |
| <b>Z</b>                                          | 4                                                    |                |
| <b>Density (calculated)</b>                       | 1.548 g/cm <sup>3</sup>                              |                |
| <b>Absorption coefficient</b>                     | 1.651 mm <sup>-1</sup>                               |                |
| <b>F(000)</b>                                     | 1608                                                 |                |

| <b>Table S13. Data collection and structure refinement for 3b.</b> |                                                                                                                         |                               |
|--------------------------------------------------------------------|-------------------------------------------------------------------------------------------------------------------------|-------------------------------|
| <b>Theta range for data collection</b>                             | 1.23 to 30.61°                                                                                                          |                               |
| <b>Index ranges</b>                                                | -26<=h<=26, -15<=k<=15, -26<=l<=26                                                                                      |                               |
| <b>Reflections collected</b>                                       | 52316                                                                                                                   |                               |
| <b>Independent reflections</b>                                     | 10479 [R(int) = 0.1087]                                                                                                 |                               |
| <b>Coverage of independent reflections</b>                         | 99.5%                                                                                                                   |                               |
| <b>Absorption correction</b>                                       | Multi-Scan                                                                                                              |                               |
| <b>Max. and min. transmission</b>                                  | 0.866 and 0.968                                                                                                         |                               |
| <b>Structure solution technique</b>                                | direct methods                                                                                                          |                               |
| <b>Structure solution program</b>                                  | SHELXT 2014/5 (Sheldrick, 2014)                                                                                         |                               |
| <b>Refinement method</b>                                           | Full-matrix least-squares on F <sup>2</sup>                                                                             |                               |
| <b>Refinement program</b>                                          | SHELXL-2017/1 (Sheldrick, 2017)                                                                                         |                               |
| <b>Function minimized</b>                                          | $\Sigma w(F_o^2 - F_c^2)^2$                                                                                             |                               |
| <b>Data / restraints / parameters</b>                              | 10479 / 0 / 424                                                                                                         |                               |
| <b>Goodness-of-fit on F<sup>2</sup></b>                            | 0.999                                                                                                                   |                               |
| <b><math>\Delta/\sigma_{\max}</math></b>                           | 0.001                                                                                                                   |                               |
| <b>Final R indices</b>                                             | 10479 data;<br>I>2 $\sigma$ (I)                                                                                         | R1 = 0.0514, wR2 =<br>0.0783  |
|                                                                    | all data                                                                                                                | R1 = 0.1094, wR2 =<br>0.09300 |
| <b>Weighting scheme</b>                                            | w=1/[ $\sigma^2(F_o^2)+(0.0276P)^2+1.2500P$ ]<br>where P=(F <sub>o</sub> <sup>2</sup> +2F <sub>c</sub> <sup>2</sup> )/3 |                               |
| <b>Largest diff. peak and hole</b>                                 | 0.768 and -0.719 eÅ <sup>-3</sup>                                                                                       |                               |



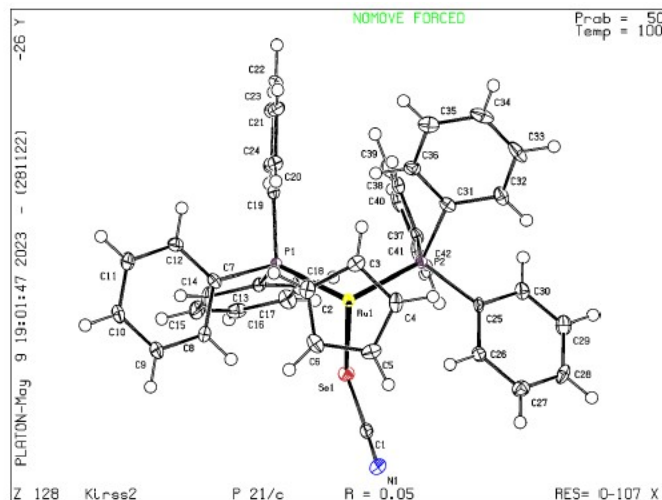

**Table S14. Bond lengths (Å) for 3b.**

|         |           |         |          |         |          |
|---------|-----------|---------|----------|---------|----------|
| Ru1 C3  | 2.202(3)  | C9 H9   | 0.9500   | C26 H26 | 0.9500   |
| Ru1 C5  | 2.205(3)  | C10 C11 | 1.378(5) | C27 C28 | 1.373(5) |
| Ru1 C2  | 2.207(3)  | C10 H10 | 0.9500   | C27 H27 | 0.9500   |
| Ru1 C4  | 2.210(3)  | C11 C12 | 1.392(5) | C28 C29 | 1.381(5) |
| Ru1 C6  | 2.211(3)  | C11 H11 | 0.9500   | C28 H28 | 0.9500   |
| Ru1 P2  | 2.3423(9) | C12 H12 | 0.9500   | C29 C30 | 1.378(5) |
| Ru1 P1  | 2.3493(9) | C13 C18 | 1.390(5) | C29 H29 | 0.9500   |
| Ru1 Se1 | 2.5424(5) | C13 C14 | 1.395(5) | C30 H30 | 0.9500   |
| Se1 C1  | 1.850(4)  | C14 C15 | 1.382(5) | C31 C36 | 1.388(5) |
| P1 C19  | 1.836(4)  | C14 H14 | 0.9500   | C31 C32 | 1.402(5) |
| P1 C7   | 1.838(3)  | C15 C16 | 1.393(5) | C32 C33 | 1.382(5) |
| P1 C13  | 1.843(3)  | C15 H15 | 0.9500   | C32 H32 | 0.9500   |
| P2 C37  | 1.836(3)  | C16 C17 | 1.377(5) | C33 C34 | 1.379(6) |
| P2 C25  | 1.843(4)  | C16 H16 | 0.9500   | C33 H33 | 0.9500   |
| P2 C31  | 1.845(4)  | C17 C18 | 1.387(5) | C34 C35 | 1.384(5) |
| N1 C1   | 1.147(5)  | C17 H17 | 0.9500   | C34 H34 | 0.9500   |
| C2 C6   | 1.400(5)  | C18 H18 | 0.9500   | C35 C36 | 1.383(5) |
| C2 C3   | 1.410(5)  | C19 C24 | 1.391(5) | C35 H35 | 0.9500   |
| C2 H2   | 0.9500    | C19 C20 | 1.397(5) | C36 H36 | 0.9500   |
| C3 C4   | 1.423(5)  | C20 C21 | 1.381(5) | C37 C38 | 1.380(5) |
| C3 H3   | 0.9500    | C20 H20 | 0.9500   | C37 C42 | 1.402(5) |
| C4 C5   | 1.407(5)  | C21 C22 | 1.390(5) | C38 C39 | 1.388(5) |
| C4 H4   | 0.9500    | C21 H21 | 0.9500   | C38 H38 | 0.9500   |

|        |          |         |          |         |          |
|--------|----------|---------|----------|---------|----------|
| C5 C6  | 1.433(5) | C22 C23 | 1.378(6) | C39 C40 | 1.380(5) |
| C5 H5  | 0.9500   | C22 H22 | 0.9500   | C39 H39 | 0.9500   |
| C6 H6  | 0.9500   | C23 C24 | 1.387(5) | C40 C41 | 1.384(5) |
| C7 C12 | 1.392(5) | C23 H23 | 0.9500   | C40 H40 | 0.9500   |
| C7 C8  | 1.393(5) | C24 H24 | 0.9500   | C41 C42 | 1.387(5) |
| C8 C9  | 1.383(5) | C25 C26 | 1.388(5) | C41 H41 | 0.9500   |
| C8 H8  | 0.9500   | C25 C30 | 1.405(4) | C42 H42 | 0.9500   |
| C9 C10 | 1.377(5) | C26 C27 | 1.391(5) |         |          |

|            |            |             |          |
|------------|------------|-------------|----------|
| C3 Ru1 C5  | 62.50(13)  | C18 C13 C14 | 118.3(3) |
| C3 Ru1 C2  | 37.30(13)  | C18 C13 P1  | 118.8(3) |
| C5 Ru1 C2  | 62.21(13)  | C14 C13 P1  | 122.9(3) |
| C3 Ru1 C4  | 37.63(13)  | C15 C14 C13 | 120.5(3) |
| C5 Ru1 C4  | 37.16(13)  | C15 C14 H14 | 119.7    |
| C2 Ru1 C4  | 62.34(13)  | C13 C14 H14 | 119.7    |
| C3 Ru1 C6  | 62.53(14)  | C14 C15 C16 | 120.3(3) |
| C5 Ru1 C6  | 37.88(13)  | C14 C15 H15 | 119.8    |
| C2 Ru1 C6  | 36.94(13)  | C16 C15 H15 | 119.8    |
| C4 Ru1 C6  | 62.74(13)  | C17 C16 C15 | 119.8(3) |
| C3 Ru1 P2  | 99.46(10)  | C17 C16 H16 | 120.1    |
| C5 Ru1 P2  | 113.02(10) | C15 C16 H16 | 120.1    |
| C2 Ru1 P2  | 135.92(10) | C16 C17 C18 | 119.7(3) |
| C4 Ru1 P2  | 87.89(9)   | C16 C17 H17 | 120.1    |
| C6 Ru1 P2  | 149.62(10) | C18 C17 H17 | 120.1    |
| C3 Ru1 P1  | 109.65(10) | C17 C18 C13 | 121.4(3) |
| C5 Ru1 P1  | 143.34(10) | C17 C18 H18 | 119.3    |
| C2 Ru1 P1  | 89.65(10)  | C13 C18 H18 | 119.3    |
| C4 Ru1 P1  | 147.24(10) | C24 C19 C20 | 118.5(3) |
| C6 Ru1 P1  | 105.60(10) | C24 C19 P1  | 123.2(3) |
| P2 Ru1 P1  | 103.52(3)  | C20 C19 P1  | 118.3(3) |
| C3 Ru1 Se1 | 157.65(10) | C21 C20 C19 | 121.0(4) |
| C5 Ru1 Se1 | 95.26(10)  | C21 C20 H20 | 119.5    |
| C2 Ru1 Se1 | 132.01(10) | C19 C20 H20 | 119.5    |
| C4 Ru1 Se1 | 124.32(10) | C20 C21 C22 | 119.8(4) |
| C6 Ru1 Se1 | 98.99(10)  | C20 C21 H21 | 120.1    |
| P2 Ru1 Se1 | 91.15(3)   | C22 C21 H21 | 120.1    |
| P1 Ru1 Se1 | 86.58(3)   | C23 C22 C21 | 119.8(4) |
| C1 Se1 Ru1 | 100.90(11) | C23 C22 H22 | 120.1    |
| C19 P1 C7  | 102.98(16) | C21 C22 H22 | 120.1    |
| C19 P1 C13 | 102.64(16) | C22 C23 C24 | 120.5(4) |
| C7 P1 C13  | 98.99(15)  | C22 C23 H23 | 119.7    |
| C19 P1 Ru1 | 116.53(12) | C24 C23 H23 | 119.7    |
| C7 P1 Ru1  | 111.20(11) | C23 C24 C19 | 120.4(4) |
| C13 P1 Ru1 | 121.69(11) | C23 C24 H24 | 119.8    |

|            |            |             |          |
|------------|------------|-------------|----------|
| C37 P2 C25 | 99.91(16)  | C19 C24 H24 | 119.8    |
| C37 P2 C31 | 101.67(15) | C26 C25 C30 | 118.1(3) |
| C25 P2 C31 | 103.14(16) | C26 C25 P2  | 120.0(2) |
| C37 P2 Ru1 | 121.96(11) | C30 C25 P2  | 121.9(3) |
| C25 P2 Ru1 | 114.66(12) | C25 C26 C27 | 120.8(3) |
| C31 P2 Ru1 | 112.97(11) | C25 C26 H26 | 119.6    |
| N1 C1 Se1  | 178.3(3)   | C27 C26 H26 | 119.6    |
| C6 C2 C3   | 109.2(3)   | C28 C27 C26 | 120.4(4) |
| C6 C2 Ru1  | 71.7(2)    | C28 C27 H27 | 119.8    |
| C3 C2 Ru1  | 71.17(19)  | C26 C27 H27 | 119.8    |
| C6 C2 H2   | 125.4      | C27 C28 C29 | 119.6(3) |
| C3 C2 H2   | 125.4      | C27 C28 H28 | 120.2    |
| Ru1 C2 H2  | 123.4      | C29 C28 H28 | 120.2    |
| C2 C3 C4   | 107.6(3)   | C30 C29 C28 | 120.7(3) |
| C2 C3 Ru1  | 71.5(2)    | C30 C29 H29 | 119.7    |
| C4 C3 Ru1  | 71.48(19)  | C28 C29 H29 | 119.7    |
| C2 C3 H3   | 126.2      | C29 C30 C25 | 120.5(4) |
| C4 C3 H3   | 126.2      | C29 C30 H30 | 119.7    |
| Ru1 C3 H3  | 122.5      | C25 C30 H30 | 119.7    |
| C5 C4 C3   | 107.8(3)   | C36 C31 C32 | 117.8(3) |
| C5 C4 Ru1  | 71.2(2)    | C36 C31 P2  | 117.8(3) |
| C3 C4 Ru1  | 70.90(19)  | C32 C31 P2  | 124.5(3) |
| C5 C4 H4   | 126.1      | C33 C32 C31 | 120.4(4) |
| C3 C4 H4   | 126.1      | C33 C32 H32 | 119.8    |
| Ru1 C4 H4  | 123.4      | C31 C32 H32 | 119.8    |
| C4 C5 C6   | 108.2(3)   | C34 C33 C32 | 121.0(4) |
| C4 C5 Ru1  | 71.6(2)    | C34 C33 H33 | 119.5    |
| C6 C5 Ru1  | 71.3(2)    | C32 C33 H33 | 119.5    |
| C4 C5 H5   | 125.9      | C33 C34 C35 | 119.2(4) |
| C6 C5 H5   | 125.9      | C33 C34 H34 | 120.4    |
| Ru1 C5 H5  | 122.9      | C35 C34 H34 | 120.4    |
| C2 C6 C5   | 107.1(3)   | C36 C35 C34 | 120.0(4) |
| C2 C6 Ru1  | 71.4(2)    | C36 C35 H35 | 120.0    |
| C5 C6 Ru1  | 70.84(19)  | C34 C35 H35 | 120.0    |
| C2 C6 H6   | 126.4      | C35 C36 C31 | 121.6(3) |
| C5 C6 H6   | 126.4      | C35 C36 H36 | 119.2    |

|             |          |             |          |
|-------------|----------|-------------|----------|
| Ru1 C6 H6   | 123.0    | C31 C36 H36 | 119.2    |
| C12 C7 C8   | 118.5(3) | C38 C37 C42 | 118.3(3) |
| C12 C7 P1   | 123.9(3) | C38 C37 P2  | 121.4(3) |
| C8 C7 P1    | 117.5(3) | C42 C37 P2  | 119.9(3) |
| C9 C8 C7    | 121.1(3) | C37 C38 C39 | 120.8(3) |
| C9 C8 H8    | 119.5    | C37 C38 H38 | 119.6    |
| C7 C8 H8    | 119.5    | C39 C38 H38 | 119.6    |
| C10 C9 C8   | 120.0(4) | C40 C39 C38 | 120.6(4) |
| C10 C9 H9   | 120.0    | C40 C39 H39 | 119.7    |
| C8 C9 H9    | 120.0    | C38 C39 H39 | 119.7    |
| C9 C10 C11  | 119.8(3) | C39 C40 C41 | 119.4(3) |
| C9 C10 H10  | 120.1    | C39 C40 H40 | 120.3    |
| C11 C10 H10 | 120.1    | C41 C40 H40 | 120.3    |
| C10 C11 C12 | 120.6(4) | C40 C41 C42 | 120.1(4) |
| C10 C11 H11 | 119.7    | C40 C41 H41 | 119.9    |
| C12 C11 H11 | 119.7    | C42 C41 H41 | 119.9    |
| C7 C12 C11  | 120.1(3) | C41 C42 C37 | 120.8(4) |
| C7 C12 H12  | 120.0    | C41 C42 H42 | 119.6    |
| C11 C12 H12 | 120.0    | C37 C42 H42 | 119.6    |

| <b>Table S16. Sample and crystal data for 4b.</b> |                                                      |                |
|---------------------------------------------------|------------------------------------------------------|----------------|
| <b>Identification code</b>                        | Kirss2, CCDC 2282640                                 |                |
| <b>Chemical formula</b>                           | C <sub>37</sub> H <sub>33</sub> NP <sub>2</sub> RuSe |                |
| <b>Formula weight</b>                             | 731.61 g/mol                                         |                |
| <b>Temperature</b>                                | 150 K                                                |                |
| <b>Wavelength</b>                                 | 0.71073 Å                                            |                |
| <b>Crystal size</b>                               | 0.22 x 0.21 x 0.06 mm                                |                |
| <b>Crystal habit</b>                              | Orange plate                                         |                |
| <b>Crystal system</b>                             | orthorhombic                                         |                |
| <b>Space group</b>                                | Pna2 <sub>1</sub>                                    |                |
| <b>Unit cell dimensions</b>                       | a = 13.1668(9) Å                                     | α = 90°        |
|                                                   | b = 21.2752(12) Å                                    | β = 114.698(2) |
|                                                   | c = 11.1139(3) Å                                     | γ = 90°        |
| <b>Volume</b>                                     | 3113.3(3) Å <sup>3</sup>                             |                |
| <b>Z</b>                                          | 4                                                    |                |
| <b>Density (calculated)</b>                       | 1.565 g/cm <sup>3</sup>                              |                |
| <b>Absorption coefficient</b>                     | 1.80 mm <sup>-1</sup>                                |                |
| <b>F(000)</b>                                     | 1480                                                 |                |

| <b>Table S17. Data collection and structure refinement for 4b.</b> |                                                                                                             |                            |
|--------------------------------------------------------------------|-------------------------------------------------------------------------------------------------------------|----------------------------|
| <b>Theta range for data collection</b>                             | 1.8 to 28.4°                                                                                                |                            |
| <b>Index ranges</b>                                                | -17<=h<=11, -27<=k<=28, -14<=l<=14                                                                          |                            |
| <b>Reflections collected</b>                                       | 33888                                                                                                       |                            |
| <b>Independent reflections</b>                                     | 7747 [R(int) = 0.101]                                                                                       |                            |
| <b>Coverage of independent reflections</b>                         | 99.5%                                                                                                       |                            |
| <b>Absorption correction</b>                                       | Multi-Scan                                                                                                  |                            |
| <b>Max. and min. transmission</b>                                  | 0.769 and 0.900                                                                                             |                            |
| <b>Structure solution technique</b>                                | direct methods                                                                                              |                            |
| <b>Structure solution program</b>                                  | SHELXT 2014/5 (Sheldrick, 2014)                                                                             |                            |
| <b>Refinement method</b>                                           | Full-matrix least-squares on F <sup>2</sup>                                                                 |                            |
| <b>Refinement program</b>                                          | SHELXL-2017/1 (Sheldrick, 2017)                                                                             |                            |
| <b>Function minimized</b>                                          | $\Sigma w(F_o^2 - F_c^2)^2$                                                                                 |                            |
| <b>Data / restraints / parameters</b>                              | 7747 / 147 / 237                                                                                            |                            |
| <b>Goodness-of-fit on F<sup>2</sup></b>                            | 1.17                                                                                                        |                            |
| <b><math>\Delta/\sigma_{\max}</math></b>                           | 0.001                                                                                                       |                            |
| <b>Final R indices</b>                                             | 5305 data;<br>I>2 $\sigma$ (I)                                                                              | R1 = 0.106, wR2 =<br>0.227 |
| <b>Weighting scheme</b>                                            | w=1/[ $\sigma^2(F_o^2)+39.579P$ ]<br>where P=(F <sub>o</sub> <sup>2</sup> +2F <sub>c</sub> <sup>2</sup> )/3 |                            |
| <b>Largest diff. peak and hole</b>                                 | 0.90 and -1.99 eÅ <sup>-3</sup>                                                                             |                            |

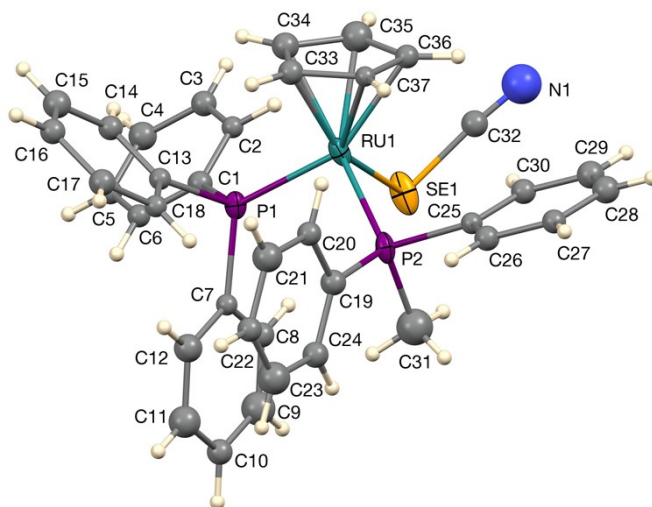

|         |            |           |           |           |        |
|---------|------------|-----------|-----------|-----------|--------|
| Ru1 C33 | 2.197(15)  | C22 H22   | 0.9500    | C7A C12A  | 1.3900 |
| Ru1 C35 | 2.216(16)  | C23 C24   | 1.3900    | C8A C9A   | 1.3900 |
| Ru1 C34 | 2.217(15)  | C23 H23   | 0.9500    | C8A H8A   | 0.9500 |
| Ru1 C37 | 2.230(15)  | C24 H24   | 0.9500    | C9A C10A  | 1.3900 |
| Ru1 C36 | 2.235(15)  | C25 C26   | 1.3900    | C9A H9A   | 0.9500 |
| Ru1 P1  | 2.276(8)   | C25 C30   | 1.3900    | C10A C11A | 1.3900 |
| Ru1 P2  | 2.292(7)   | C26 C27   | 1.3900    | C10A H10A | 0.9500 |
| Ru1 Se1 | 2.542(4)   | C26 H26   | 0.9500    | C11A C12A | 1.3900 |
| Se1 C32 | 1.8506(13) | C27 C28   | 1.3900    | C11A H11A | 0.9500 |
| P1 C13  | 1.841(10)  | C27 H27   | 0.9500    | C12A H12A | 0.9500 |
| P1 C7   | 1.867(10)  | C28 C29   | 1.3900    | C13A C14A | 1.3900 |
| P1 C1   | 1.869(10)  | C28 H28   | 0.9500    | C13A C18A | 1.3900 |
| P2 C31  | 1.83(2)    | C29 C30   | 1.3900    | C14A C15A | 1.3900 |
| P2 C19  | 1.834(10)  | C29 H29   | 0.9500    | C14A H14A | 0.9500 |
| P2 C25  | 1.869(10)  | C30 H30   | 0.9500    | C15A C16A | 1.3900 |
| N1 C32  | 1.1476(13) | C31 H31A  | 0.9800    | C15A H15A | 0.9500 |
| C1 C2   | 1.3900     | C31 H31B  | 0.9800    | C16A C17A | 1.3900 |
| C1 C6   | 1.3900     | C31 H31C  | 0.9800    | C16A H16A | 0.9500 |
| C2 C3   | 1.3900     | C33 C34   | 1.421(18) | C17A C18A | 1.3900 |
| C2 H2   | 0.9500     | C33 C37   | 1.422(17) | C17A H17A | 0.9500 |
| C3 C4   | 1.3900     | C33 H33   | 0.9500    | C18A H18A | 0.9500 |
| C3 H3   | 0.9500     | C34 C35   | 1.417(19) | C19A C20A | 1.3900 |
| C4 C5   | 1.3900     | C34 H34   | 0.9500    | C19A C24A | 1.3900 |
| C4 H4   | 0.9500     | C35 C36   | 1.405(18) | C20A C21A | 1.3900 |
| C5 C6   | 1.3900     | C35 H35   | 0.9500    | C20A H20A | 0.9500 |
| C5 H5   | 0.9500     | C36 C37   | 1.433(17) | C21A C22A | 1.3900 |
| C6 H6   | 0.9500     | C36 H36   | 0.9500    | C21A H21A | 0.9500 |
| C7 C8   | 1.3900     | C37 H37   | 0.9500    | C22A C23A | 1.3900 |
| C7 C12  | 1.3900     | Ru1A C36A | 2.210(19) | C22A H22A | 0.9500 |
| C8 C9   | 1.3900     | Ru1A C33A | 2.21(2)   | C23A C24A | 1.3900 |
| C8 H8   | 0.9500     | Ru1A C34A | 2.22(2)   | C23A H23A | 0.9500 |
| C9 C10  | 1.3900     | Ru1A C37A | 2.22(2)   | C24A H24A | 0.9500 |
| C9 H9   | 0.9500     | Ru1A C35A | 2.23(2)   | C25A C26A | 1.3900 |
| C10 C11 | 1.3900     | Ru1A P2A  | 2.284(13) | C25A C30A | 1.3900 |
| C10 H10 | 0.9500     | Ru1A P1A  | 2.308(19) | C26A C27A | 1.3900 |



|         |        |           |            |           |         |
|---------|--------|-----------|------------|-----------|---------|
| C11 C12 | 1.3900 | Ru1A Se1A | 2.536(7)   | C26A H26A | 0.9500  |
| C11 H11 | 0.9500 | Se1A C32A | 1.8502(14) | C27A C28A | 1.3900  |
| C12 H12 | 0.9500 | P1A C13A  | 1.843(17)  | C27A H27A | 0.9500  |
| C13 C14 | 1.3900 | P1A C1A   | 1.861(17)  | C28A C29A | 1.3900  |
| C13 C18 | 1.3900 | P1A C7A   | 1.872(17)  | C28A H28A | 0.9500  |
| C14 C15 | 1.3900 | P2A C31A  | 1.83(3)    | C29A C30A | 1.3900  |
| C14 H14 | 0.9500 | P2A C19A  | 1.850(16)  | C29A H29A | 0.9500  |
| C15 C16 | 1.3900 | P2A C25A  | 1.855(16)  | C30A H30A | 0.9500  |
| C15 H15 | 0.9500 | N1A C32A  | 1.1472(13) | C31A H31D | 0.9800  |
| C16 C17 | 1.3900 | C1A C2A   | 1.3900     | C31A H31E | 0.9800  |
| C16 H16 | 0.9500 | C1A C6A   | 1.3900     | C31A H31F | 0.9800  |
| C17 C18 | 1.3900 | C2A C3A   | 1.3900     | C33A C37A | 1.42(2) |
| C17 H17 | 0.9500 | C2A H2A   | 0.9500     | C33A C34A | 1.43(2) |
| C18 H18 | 0.9500 | C3A C4A   | 1.3900     | C33A H33A | 0.9500  |
| C19 C20 | 1.3900 | C3A H3A   | 0.9500     | C34A C35A | 1.43(2) |
| C19 C24 | 1.3900 | C4A C5A   | 1.3900     | C34A H34A | 0.9500  |
| C20 C21 | 1.3900 | C4A H4A   | 0.9500     | C35A C36A | 1.42(2) |
| C20 H20 | 0.9500 | C5A C6A   | 1.3900     | C35A H35A | 0.9500  |
| C21 C22 | 1.3900 | C5A H5A   | 0.9500     | C36A C37A | 1.43(2) |
| C21 H21 | 0.9500 | C6A H6A   | 0.9500     | C36A H36A | 0.9500  |
| C22 C23 | 1.3900 | C7A C8A   | 1.3900     | C37A H37A | 0.9500  |

|             |           |                |           |
|-------------|-----------|----------------|-----------|
| C33 Ru1 C35 | 62.0(8)   | C36A Ru1A C33A | 64.2(13)  |
| C33 Ru1 C34 | 37.6(5)   | C36A Ru1A C34A | 63.5(13)  |
| C35 Ru1 C34 | 37.3(5)   | C33A Ru1A C34A | 37.6(6)   |
| C33 Ru1 C37 | 37.5(5)   | C36A Ru1A C37A | 37.5(6)   |
| C35 Ru1 C37 | 61.0(8)   | C33A Ru1A C37A | 37.5(6)   |
| C34 Ru1 C37 | 62.2(7)   | C34A Ru1A C37A | 61.6(14)  |
| C33 Ru1 C36 | 63.4(7)   | C36A Ru1A C35A | 37.5(6)   |
| C35 Ru1 C36 | 36.8(5)   | C33A Ru1A C35A | 62.8(12)  |
| C34 Ru1 C36 | 63.1(7)   | C34A Ru1A C35A | 37.5(6)   |
| C37 Ru1 C36 | 37.4(5)   | C37A Ru1A C35A | 61.2(15)  |
| C33 Ru1 P1  | 96.6(6)   | C36A Ru1A P2A  | 141.3(10) |
| C35 Ru1 P1  | 119.0(6)  | C33A Ru1A P2A  | 110.0(11) |
| C34 Ru1 P1  | 90.0(6)   | C34A Ru1A P2A  | 88.6(13)  |
| C37 Ru1 P1  | 131.9(5)  | C37A Ru1A P2A  | 147.1(11) |
| C36 Ru1 P1  | 153.0(6)  | C35A Ru1A P2A  | 104.3(11) |
| C33 Ru1 P2  | 111.9(5)  | C36A Ru1A P1A  | 121.4(10) |
| C35 Ru1 P2  | 143.8(6)  | C33A Ru1A P1A  | 99.0(12)  |
| C34 Ru1 P2  | 149.4(5)  | C34A Ru1A P1A  | 133.7(12) |
| C37 Ru1 P2  | 92.0(5)   | C37A Ru1A P1A  | 94.4(12)  |
| C36 Ru1 P2  | 107.2(5)  | C35A Ru1A P1A  | 155.5(12) |
| P1 Ru1 P2   | 96.9(3)   | P2A Ru1A P1A   | 97.1(5)   |
| C33 Ru1 Se1 | 154.8(5)  | C36A Ru1A Se1A | 91.0(10)  |
| C35 Ru1 Se1 | 93.2(6)   | C33A Ru1A Se1A | 154.9(10) |
| C34 Ru1 Se1 | 119.2(5)  | C34A Ru1A Se1A | 135.3(11) |
| C37 Ru1 Se1 | 135.4(4)  | C37A Ru1A Se1A | 119.2(9)  |
| C36 Ru1 Se1 | 100.0(5)  | C35A Ru1A Se1A | 100.2(11) |
| P1 Ru1 Se1  | 91.8(2)   | P2A Ru1A Se1A  | 91.5(4)   |
| P2 Ru1 Se1  | 90.5(2)   | P1A Ru1A Se1A  | 90.7(4)   |
| C32 Se1 Ru1 | 99.6(6)   | C32A Se1A Ru1A | 102.4(12) |
| C13 P1 C7   | 104.6(8)  | C13A P1A C1A   | 100.8(19) |
| C13 P1 C1   | 101.8(8)  | C13A P1A C7A   | 107.1(18) |
| C7 P1 C1    | 95.9(8)   | C1A P1A C7A    | 99.0(17)  |
| C13 P1 Ru1  | 111.5(6)  | C13A P1A Ru1A  | 122.6(14) |
| C7 P1 Ru1   | 122.3(6)  | C1A P1A Ru1A   | 114.4(13) |
| C1 P1 Ru1   | 117.8(6)  | C7A P1A Ru1A   | 110.1(13) |
| C31 P2 C19  | 105.7(12) | C31A P2A C19A  | 100(2)    |
| C31 P2 C25  | 99.8(12)  | C31A P2A C25A  | 98(2)     |
| C19 P2 C25  | 101.3(8)  | C19A P2A C25A  | 104.0(17) |
| C31 P2 Ru1  | 118.6(10) | C31A P2A Ru1A  | 121(2)    |
| C19 P2 Ru1  | 118.1(7)  | C19A P2A Ru1A  | 118.3(14) |
| C25 P2 Ru1  | 110.6(6)  | C25A P2A Ru1A  | 112.8(12) |
| C2 C1 C6    | 120.0     | C2A C1A C6A    | 120.0     |
| C2 C1 P1    | 117.4(9)  | C4A C3A C2A    | 120.0     |
| C6 C1 P1    | 122.2(9)  | C4A C3A H3A    | 120.0     |
| C3 C2 C1    | 120.0     | C2A C3A H3A    | 120.0     |
| C3 C2 H2    | 120.0     | C3A C4A C5A    | 120.0     |
| C1 C2 H2    | 120.0     | C3A C4A H4A    | 120.0     |
| C2 C3 C4    | 120.0     | C5A C4A H4A    | 120.0     |
| C2 C3 H3    | 120.0     | C4A C5A C6A    | 120.0     |
| C4 C3 H3    | 120.0     | C4A C5A H5A    | 120.0     |
| C5 C4 C3    | 120.0     | C6A C5A H5A    | 120.0     |

|             |           |                |           |
|-------------|-----------|----------------|-----------|
| C5 C4 H4    | 120.0     | C5A C6A C1A    | 120.0     |
| C3 C4 H4    | 120.0     | C5A C6A H6A    | 120.0     |
| C4 C5 C6    | 120.0     | C1A C6A H6A    | 120.0     |
| C4 C5 H5    | 120.0     | C8A C7A C12A   | 120.0     |
| C6 C5 H5    | 120.0     | C8A C7A P1A    | 118.7(18) |
| C5 C6 C1    | 120.0     | C12A C7A P1A   | 121.3(18) |
| C5 C6 H6    | 120.0     | C9A C8A C7A    | 120.0     |
| C1 C6 H6    | 120.0     | C9A C8A H8A    | 120.0     |
| C8 C7 C12   | 120.0     | C7A C8A H8A    | 120.0     |
| C8 C7 P1    | 115.6(9)  | C8A C9A C10A   | 120.0     |
| C12 C7 P1   | 124.4(9)  | C8A C9A H9A    | 120.0     |
| C9 C8 C7    | 120.0     | C10A C9A H9A   | 120.0     |
| C9 C8 H8    | 120.0     | C11A C10A C9A  | 120.0     |
| C7 C8 H8    | 120.0     | C11A C10A H10A | 120.0     |
| C10 C9 C8   | 120.0     | C9A C10A H10A  | 120.0     |
| C10 C9 H9   | 120.0     | C10A C11A C12A | 120.0     |
| C8 C9 H9    | 120.0     | C10A C11A H11A | 120.0     |
| C9 C10 C11  | 120.0     | C12A C11A H11A | 120.0     |
| C9 C10 H10  | 120.0     | C11A C12A C7A  | 120.0     |
| C11 C10 H10 | 120.0     | C11A C12A H12A | 120.0     |
| C10 C11 C12 | 120.0     | C7A C12A H12A  | 120.0     |
| C10 C11 H11 | 120.0     | C14A C13A C18A | 120.0     |
| C12 C11 H11 | 120.0     | C14A C13A P1A  | 116(2)    |
| C11 C12 C7  | 120.0     | C18A C13A P1A  | 124(2)    |
| C11 C12 H12 | 120.0     | C15A C14A C13A | 120.0     |
| C7 C12 H12  | 120.0     | C15A C14A H14A | 120.0     |
| C14 C13 C18 | 120.0     | C13A C14A H14A | 120.0     |
| C14 C13 P1  | 120.4(8)  | C16A C15A C14A | 120.0     |
| C18 C13 P1  | 119.4(8)  | C16A C15A H15A | 120.0     |
| C13 C14 C15 | 120.0     | C14A C15A H15A | 120.0     |
| C13 C14 H14 | 120.0     | C15A C16A C17A | 120.0     |
| C15 C14 H14 | 120.0     | C15A C16A H16A | 120.0     |
| C16 C15 C14 | 120.0     | C17A C16A H16A | 120.0     |
| C16 C15 H15 | 120.0     | C18A C17A C16A | 120.0     |
| C14 C15 H15 | 120.0     | C18A C17A H17A | 120.0     |
| C17 C16 C15 | 120.0     | C16A C17A H17A | 120.0     |
| C17 C16 H16 | 120.0     | C17A C18A C13A | 120.0     |
| C15 C16 H16 | 120.0     | C17A C18A H18A | 120.0     |
| C16 C17 C18 | 120.0     | C13A C18A H18A | 120.0     |
| C16 C17 H17 | 120.0     | C20A C19A C24A | 120.0     |
| C18 C17 H17 | 120.0     | C20A C19A P2A  | 123(2)    |
| C17 C18 C13 | 120.0     | C24A C19A P2A  | 117(2)    |
| C17 C18 H18 | 120.0     | C21A C20A C19A | 120.0     |
| C13 C18 H18 | 120.0     | C21A C20A H20A | 120.0     |
| C20 C19 C24 | 120.0     | C19A C20A H20A | 120.0     |
| C20 C19 P2  | 118.0(10) | C20A C21A C22A | 120.0     |
| C24 C19 P2  | 122.0(10) | C20A C21A H21A | 120.0     |
| C19 C20 C21 | 120.0     | C22A C21A H21A | 120.0     |
| C19 C20 H20 | 120.0     | C21A C22A C23A | 120.0     |
| C21 C20 H20 | 120.0     | C21A C22A H22A | 120.0     |
| C20 C21 C22 | 120.0     | C23A C22A H22A | 120.0     |
| C20 C21 H21 | 120.0     | C24A C23A C22A | 120.0     |
| C22 C21 H21 | 120.0     | C24A C23A H23A | 120.0     |

|               |           |                |           |
|---------------|-----------|----------------|-----------|
| C23 C22 C21   | 120.0     | C22A C23A H23A | 120.0     |
| C23 C22 H22   | 120.0     | C23A C24A C19A | 120.0     |
| C21 C22 H22   | 120.0     | C23A C24A H24A | 120.0     |
| C24 C23 C22   | 120.0     | C19A C24A H24A | 120.0     |
| C24 C23 H23   | 120.0     | C26A C25A C30A | 120.0     |
| C22 C23 H23   | 120.0     | C26A C25A P2A  | 117.5(17) |
| C23 C24 C19   | 120.0     | C30A C25A P2A  | 122.4(17) |
| C23 C24 H24   | 120.0     | C25A C26A C27A | 120.0     |
| C19 C24 H24   | 120.0     | C25A C26A H26A | 120.0     |
| C26 C25 C30   | 120.0     | C27A C26A H26A | 120.0     |
| C26 C25 P2    | 123.7(8)  | C26A C27A C28A | 120.0     |
| C30 C25 P2    | 116.2(8)  | C26A C27A H27A | 120.0     |
| C27 C26 C25   | 120.0     | C28A C27A H27A | 120.0     |
| C27 C26 H26   | 120.0     | C29A C28A C27A | 120.0     |
| C25 C26 H26   | 120.0     | C29A C28A H28A | 120.0     |
| C26 C27 C28   | 120.0     | C27A C28A H28A | 120.0     |
| C26 C27 H27   | 120.0     | C30A C29A C28A | 120.0     |
| C28 C27 H27   | 120.0     | C30A C29A H29A | 120.0     |
| C29 C28 C27   | 120.0     | C28A C29A H29A | 120.0     |
| C29 C28 H28   | 120.0     | C29A C30A C25A | 120.0     |
| C27 C28 H28   | 120.0     | C29A C30A H30A | 120.0     |
| C30 C29 C28   | 120.0     | C25A C30A H30A | 120.0     |
| C30 C29 H29   | 120.0     | P2A C31A H31D  | 109.5     |
| C28 C29 H29   | 120.0     | P2A C31A H31E  | 109.5     |
| C29 C30 C25   | 120.0     | H31D C31A H31E | 109.5     |
| C29 C30 H30   | 120.0     | P2A C31A H31F  | 109.5     |
| C25 C30 H30   | 120.0     | H31D C31A H31F | 109.5     |
| P2 C31 H31A   | 109.5     | H31E C31A H31F | 109.5     |
| P2 C31 H31B   | 109.5     | N1A C32A Se1A  | 177(3)    |
| H31A C31 H31B | 109.5     | C37A C33A C34A | 106(3)    |
| P2 C31 H31C   | 109.5     | C37A C33A Ru1A | 71.5(10)  |
| H31A C31 H31C | 109.5     | C34A C33A Ru1A | 71.3(10)  |
| H31B C31 H31C | 109.5     | C37A C33A H33A | 127.1     |
| N1 C32 Se1    | 175.5(17) | C34A C33A H33A | 127.1     |
| C34 C33 C37   | 107.8(16) | Ru1A C33A H33A | 121.8     |
| C34 C33 Ru1   | 72.0(8)   | C35A C34A C33A | 108(3)    |
| C37 C33 Ru1   | 72.5(8)   | C35A C34A Ru1A | 71.6(10)  |
| C34 C33 H33   | 126.1     | C33A C34A Ru1A | 71.1(10)  |
| C37 C33 H33   | 126.1     | C35A C34A H34A | 125.8     |
| Ru1 C33 H33   | 121.1     | C33A C34A H34A | 125.8     |
| C35 C34 C33   | 106.4(17) | Ru1A C34A H34A | 123.1     |
| C35 C34 Ru1   | 71.3(8)   | C36A C35A C34A | 109(3)    |
| C33 C34 Ru1   | 70.4(8)   | C36A C35A Ru1A | 70.7(10)  |
| C35 C34 H34   | 126.8     | C34A C35A Ru1A | 70.9(10)  |
| C33 C34 H34   | 126.8     | C36A C35A H35A | 125.3     |
| Ru1 C34 H34   | 123.2     | C34A C35A H35A | 125.3     |
| C36 C35 C34   | 111.3(17) | Ru1A C35A H35A | 124.7     |
| C36 C35 Ru1   | 72.4(8)   | C35A C36A C37A | 105(3)    |
| C34 C35 Ru1   | 71.4(8)   | C35A C36A Ru1A | 71.9(10)  |
| C36 C35 H35   | 124.4     | C37A C36A Ru1A | 71.6(10)  |
| C34 C35 H35   | 124.4     | C35A C36A H36A | 127.4     |
| Ru1 C35 H35   | 123.4     | C37A C36A H36A | 127.4     |
| C35 C36 C37   | 105.2(16) | Ru1A C36A H36A | 121.0     |

|             |           |                |          |
|-------------|-----------|----------------|----------|
| C35 C36 Ru1 | 70.8(8)   | C33A C37A C36A | 111(3)   |
| C37 C36 Ru1 | 71.1(8)   | C33A C37A Ru1A | 71.0(10) |
| C35 C36 H36 | 127.4     | C36A C37A Ru1A | 70.8(10) |
| C37 C36 H36 | 127.4     | C33A C37A H37A | 124.4    |
| Ru1 C36 H36 | 122.5     | C36A C37A H37A | 124.4    |
| C33 C37 C36 | 109.2(15) | Ru1A C37A H37A | 125.3    |
| C33 C37 Ru1 | 70.0(8)   | C37A C36A H36A | 127.4    |
| C36 C37 Ru1 | 71.5(8)   | Ru1A C36A H36A | 121.0    |
| C33 C37 H37 | 125.4     | C33A C37A C36A | 111(3)   |
| C36 C37 H37 | 125.4     | C33A C37A Ru1A | 71.0(10) |
| Ru1 C37 H37 | 124.7     |                |          |

### Derivation of the rate law

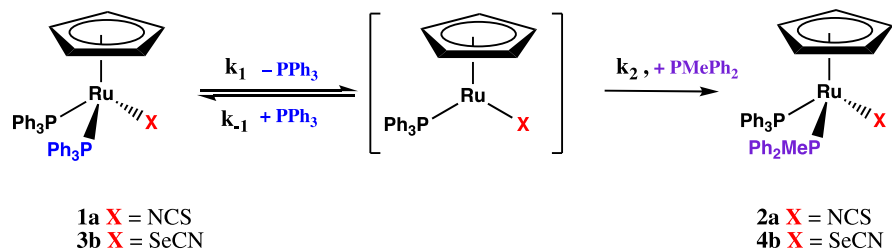

$$\frac{d[2a]}{dt} = k_2[CpRu(PPh_3)Cl][PMePh_2] \quad (1)$$

From the steady state approximation,  $\frac{d[CpRu(PPh_3)Cl]}{dt} = 0$

$$\frac{d[CpRu(PPh_3)Cl]}{dt} = k_1[1a] - k_{-1}[CpRu(PPh_3)Cl][PPh_3] - k_2[CpRu(PPh_3)Cl][PMePh_2] = 0 \quad (2)$$

Solving for  $[CpRu(PPh_3)Cl]$ :

$$[CpRu(PPh_3)Cl] = \frac{k_1[CpRu(PPh_3)_2Cl]}{k_{-1}[PPh_3] + k_2[PMePh_2]} \quad (3)$$

Substituting the  $[CpRu(PPh_3)Cl]$  into equation (1):

$$\frac{d[2a]}{dt} = \frac{k_1 k_2 [CpRu(PPh_3)_2Cl][PMePh_2]}{k_{-1}[PPh_3] + k_2[PMePh_2]} = -\frac{d[1a]}{dt} \quad (4)$$

Where

$$k_{obs} = \frac{k_1 k_2 [PMePh_2]}{k_{-1}[PPh_3] + k_2[PMePh_2]} \quad (5)$$

Rearranging equation (5):

$$\frac{1}{k_{obs}} = \frac{k_{-1}[PPh_3] + k_2[PMePh_2]}{k_1 k_2 [PMePh_2]} = \frac{k_{-1}[PPh_3]}{k_1 k_2 [PMePh_2]} + \frac{k_2[PMePh_2]}{k_1 k_2 [PMePh_2]} = \frac{k_{-1}[PPh_3]}{k_1 k_2 [PMePh_2]} + \frac{1}{k_1} \quad (6)$$

## References

1. T. Wilczeski, M. Bochenska, and J. F. Bernat, *J. F. J. Organometal. Chem.* 1981, **215**, 87-96.
2. M. I. Bruce, C. Hameister, A. G. Swincer, and R. C. Wallis, *Inorg. Synth.* 1990, **28**, 270.
3. P. M. Treichel and D. A. Komar, *Synth. React. Inorg. Met.-Org. Chem.* 1980, **10**, 205-218.
4. a. P. M. Treichel and P. J. Vincenti, *Inorg. Chem.* 1985, **24**, 228-230; b. P. M. Treichel, D. A. Komar, and P. Vincenti, *Inorg. Chim. Acta* 1984, **88**, 151-152; c. R. J. Haines and A. L. DuPreez, *A. L. J. Organometal. Chem.* 1975, **84**, 357-367.
5. Personal communication with Prof. Terry Haas (Tufts University) and Prof. Bruce Foxman (Brandeis University).
6. A. Martinsen and J. Songstad, *Acta Chem. Scandinavica* 1977, **31**, 645-650.
7. J. Songstad and L. J. Stangeland *Acta Chem. Scandinavica* 1970, **24**, 804-808.
8. a. M. J. Verschoor-Kirss, O. Hendricks, L. Renna, D. Hill, and R. U. Kirss, *Dalton Trans.* 2014 **43**, 15221-15227; b. D. Hill, C. Delaney, M. Clark, M. Eaton, B. Hassan, O. Hendricks, D. K. Dang, and R. U. Kirss, *RSC Advances* 2017, **7**, 34425-34434.
9. M. J. Frisch, G. W. Trucks, H. B. Schlegel, G. E. Scuseria, M. A. Robb, J. R. Cheeseman, G. Scalmani, V. Barone, B. Mennucci, G. A. Petersson, H. Nakatsuji, M. Caricato, X. Li, H. P. Hratchian, A. F. Izmaylov, J. Bloino, G. Zheng, J. L. Sonnenberg, M. Hada, M. Ehara, K. Toyota, R. Fukuda, J. Hasegawa, M. Ishida, T. Nakajima, Y. Honda, O. Kitao, H. Nakai, T. Vreven, J. J. A. Montgomery, J. E. Peralta, F. Ogliaro, M. Bearpark, J. J. Heyd, E. Brothers, K. N. Kudin, V. N. Staroverov, T. Keith, R. Kobayashi, J. Normand, K. Raghavachari, A. Rendell, J. C. Burant, S. S. Iyengar, J. Tomasi, M. Cossi, N. Rega, J. M. Millam, M. Klene, J. E. Knox, J. B. Cross, V. Bakken, C. Adamo, J. Jaramillo, R. Gomperts, R. E. Stratmann, O. Yazyev, A. J. Austin, R. Cammi, C. Pomelli, J. W. Ochterski, R. L. Martin, K. Morokuma, V. G. Zakrzewski, G. A. Voth, P. Salvador, J. J. Dannenberg, S. Dapprich, A. D. Daniels, O. Farkas, J. B. Foresman, J. V. Ortiz, J. Cioslowski and D. J. Fox, Gaussian 09 Revision B.01, Gaussian, Inc., Wallingford, CT, 2010.
10. a. N. Godbout, D. R. Salahub, J. Andzelm, and E. Wimmer, *Can. J. Chem.*, 1992, **70**, 560-71; b. C. Sosa, J. Andzelm, B. C. Elkin, E. Wimmer, K. D. Dobbs, and D. A. Dixon, *J. Phys. Chem.*, 1992, **96**, 6630-36
11. a. T. H. Dunning Jr. and P. J. Hay, in *Modern Theoretical Chemistry*, Ed. H. F. Schaefer III, Vol. 3, Plenum, New York, **1977**, 1-28; b. W. R. Wadt and P. J. Hay, *J. Chem. Phys.*, 1985 **82** 284-98; c. P. J. Hay and W. R. Wadt, *J. Chem. Phys.*, 1985, **82**, 299-310; P. J. Hay and W. R. Wadt, *J. Chem. Phys.*, 1985, **82**, 270-83.
12. a. Avogadro: an open-source molecular builder and visualization tool. Version 1.1.1. <http://avogadro.openmolecules.net>; b. M. D. Hanwell, D. E. Curtis, D. C. Lonie, T. Vandermeersch, E. Zurek and G. R. Hutchison, *Journal of Cheminformatics* 2012, **4**, 17.
13. a. Gaussian 16, Revision A.03, M. J. Frisch, G. W. Trucks, H. B. Schlegel, G. E. Scuseria, M. A. Robb, J. R. Cheeseman, G. Scalmani, V. Barone, G. A. Petersson, H. Nakatsuji, X. Li, M. Caricato, A. V. Marenich, J. Bloino, B. G. Janesko, R. Gomperts, B. Mennucci, H. P. Hratchian, J. V. Ortiz, A. F.

Izmaylov, J. L. Sonnenberg, D. Williams-Young, F. Ding, F. Lipparini, F. Egidi, J. Goings, B. Peng, A. Petrone, T. Henderson, D. Ranasinghe, V. G. Zakrzewski, J. Gao, N. Rega, G. Zheng, W. Liang, M. Hada, M. Ehara, K. Toyota, R. Fukuda, J. Hasegawa, M. Ishida, T. Nakajima, Y. Honda, O. Kitao, H. Nakai, T. Vreven, K. Throssell, J. A. Montgomery, Jr., J. E. Peralta, F. Ogliaro, M. J. Bearpark, J. J. Heyd, E. N. Brothers, K. N., Kudin, V. N. Staroverov, T. A. Keith, R. Kobayashi, J. Normand, K. Raghavachari, A. P. Rendell, J. C. Burant, S. S. Iyengar, J. Tomasi, M. Cossi, J. M. Millam, M. Klene, C. Adamo, R. Cammi, J. W. Ochterski, R. L. Martin, K. Morokuma, O. Farkas, J. B. Foresman and D. J. Fox, Gaussian, Inc., Wallingford CT, 2016; b. Y. Zhao and D. G. Truhlar, *Theor Chem Account* 2008, **120**, 215–241. <https://doi.org/10.1007/s00214-007-0310-x> c. F. Weigend and R. Ahlrichs, *Phys. Chem. Chem. Phys.* 2005, **7**, 3297-305. d. F. Weigend, *Phys. Chem. Chem. Phys.*, 2006, **8**, 1057-65; e. B. Mennucci, *WIREs Comput. Mol. Sci.* 2012, **2**, 386-404.
